# Supplementary material for: Genomic Insights into Bordetella pertussis Evolution and Macrolide Resistance in Yiwu, China
Source: Research Square preprint supplement (doi:10.21203/rs.3.rs-6608985/v1), 2025-06-11
Supplement: Supplementary file 1 [file fc040ad3b36facceb054a62c.xlsx]

## Sheet: Table S1
Table S1 Basic information and drug resistance phenotypes of 63 Bordetella pertussis clinical isolates
Sample ID	Age at diagnosis	Isolates collection date	Sex	Vaccination status prior to illness	Initial vaccination date	Erythromycin MIC (μg/mL)	Clarithromycin MIC (μg/mL)	Azithromycin MIC (μg/mL)	Meropenem MIC (μg/mL)	Trimethoprim-Sulfamethoxazole MIC (μg/mL)	Amoxicillin-Clavulanic Acid MIC (μg/mL)	Ceftriaxone MIC (μg/mL)	Levofloxacin MIC (μg/mL)	Ciprofloxacin MIC (μg/mL)
YW1	6 years 6 months	2021-07-28	Male	Yes	Unknow	>256	>256	>256	0.032	0.016	0.125	0.125	0.008	0.008
YW2	4 years	2022-08-09	Male	Yes	2017/12/30	>256	>256	>256	0.064	0.016	0.125	0.125	0.008	0.008
YW4	4 years 10 months	2021-08-22	Female	Yes	2016/12/30	>256	>256	>256	0.032	0.064	0.125	0.125	0.008	0.008
YW5	1 year 4 months	2021-08-26	Male	Yes	2020/3	>256	>256	>256	0.064	0.032	0.125	0.125	0.008	0.008
YW6	2 years 4 months	2021-09-13	Male	Yes	2019/8/5	>256	>256	>256	0.064	0.032	0.125	0.125	0.008	0.008
YW7	2 months	2021-10-03	Male	No	Unknow	0.064	0.064	0.064	0.032	0.064	0.125	0.125	0.008	0.008
YW8	1 year 9 months	2021-10-26	Female	Yes	Unknow	>256	>256	>256	0.064	0.032	0.25	0.125	0.008	0.008
YW9	3 years 3 months	2021-10-23	Female	Yes	2018/9/20	>256	>256	>256	0.064	0.032	0.125	0.125	0.008	0.008
YW10	3 years 10 months	2021-11-13	Male	Yes	2018/3/6	>256	>256	>256	0.064	0.016	0.25	0.125	0.008	0.008
YW11	1 year 4 months	2021-11-21	Male	Yes	2020/9/18	>256	>256	>256	0.064	0.032	0.25	0.125	0.008	0.008
YW12	6 years 1 month	2021-11-22	Male	Yes	2016/1/15	>256	>256	>256	0.064	0.032	0.25	0.125	0.008	0.008
YW17	13 years	2021-11-27	Male	Yes	2009/2/3	>256	>256	64	0.032	0.016	0.125	0.064	0.008	0.008
YW18	2 months	2021-12-08	Male	No	2022/3/21	>256	>256	64	0.032	0.016	0.25	0.064	0.008	0.008
YW19	4 years 2 months	2021-12-09	Female	Yes	2017/12	>256	>256	64	0.032	0.008	0.25	0.064	0.008	0.008
YW20	5 years 8 months	2021-12-10	Male	Yes	Unknow	>256	>256	>256	0.064	0.032	0.25	0.125	0.008	0.008
YW21	6 years 3 months	2021-12-10	Female	Yes	2015/12	>256	>256	>256	0.064	0.064	0.125	0.125	0.008	0.008
YW23	4 years 1 month	2021-12-14	Male	Yes	2018/1/15	>256	>256	>256	0.064	0.032	0.25	0.125	0.008	0.008
YW24	5 years 8 months	2021-12-20	Female	Yes	Unknow	>256	>256	>256	0.032	0.032	0.25	0.125	0.008	0.008
YW25	4 years 6 months	2021-12-20	Female	Yes	2017/9/7	>256	>256	>256	0.032	0.064	0.25	0.25	0.008	0.008
YW26	10 years	2021-12-24	Male	Yes	Unknow	>256	>256	>256	0.064	0.032	0.25	0.25	0.008	0.008
YW28	31 years	2021-12-30	Female	Yes	Unknow	>256	>256	>256	0.064	0.032	0.125	0.064	0.008	0.008
YW29	1 month	2021-12-30	Female	No	2022/1/21	>256	>256	>256	0.032	0.016	0.25	0.125	0.008	0.008
YW31	4 years 9 months	2022-02-10	Female	Yes	2017/7/18	>256	>256	>256	0.064	0.032	0.5	0.125	0.008	0.008
YW32	9 months	2022-02-24	Female	Yes	2021/8/3	>256	>256	>256	0.032	0.016	0.5	0.125	0.008	0.008
YW34	7 years 5 months	2022-02-24	Male	Yes	Unknow	>256	>256	>256	0.064	0.032	0.25	0.125	0.008	0.008
YW35	6 years 8 months	2022-03-06	Male	Yes	Unknow	>256	>256	>256	0.064	0.032	0.25	0.125	0.008	0.008
YW36	4 months	2022-03-15	Male	No	Unknow	>256	>256	>256	0.064	0.032	0.25	0.125	0.008	0.008
YW37	9 years 9 months	2022-03-15	Male	Yes	2012/8/17	>256	>256	>256	0.064	0.032	0.5	0.125	0.008	0.008
YW38	3 years 10 months	2022-03-16	Female	Yes	Unknow	>256	>256	>256	0.064	0.032	0.25	0.125	0.008	0.008
YW40	7 years 4 months	2022-03-21	Female	Yes	Unknow	>256	>256	32	0.032	0.008	0.064	0.064	0.008	0.008
YW41	3 months	2022-03-24	Female	No	Unknow	>256	>256	>256	0.064	0.032	0.5	0.125	0.008	0.008
YW42	2 years 4 months	2022-03-25	Male	Yes	2020/2/29	>256	>256	128	0.032	0.008	0.125	0.064	0.008	0.008
YW43	4 years 2 months	2022-03-27	Male	Yes	2018/3/23	>256	>256	>256	0.064	0.032	0.25	0.125	0.008	0.008
YW44	40 years	2022-03-29	Male	Yes	Unknow	>256	>256	>256	0.064	0.016	0.125	0.064	0.008	0.008
YW49	4 years 3 months	2022-04-21	Male	Yes	Unknow	>256	>256	>256	0.032	0.016	0.25	0.25	0.008	0.008
YW50	5 years 3 months	2022-04-21	Female	Yes	2017/4/13	>256	>256	>256	0.064	0.016	0.25	0.064	0.008	0.008
YW51	8 months	2022-05-01	Female	Yes	Unknow	>256	>256	>256	0.064	0.032	0.25	0.125	0.008	0.008
YW53	5 years 1 month	2022-05-06	Male	Yes	2017/6	>256	>256	>256	0.064	0.032	0.125	0.125	0.008	0.008
YW54	4 months	2022-05-08	Female	No	2022/7/19	>256	>256	>256	0.064	0.032	0.125	0.125	0.008	0.008
YW55	6 years 5 months	2022-05-21	Male	Yes	2016/3/9	>256	>256	>256	0.064	0.032	0.125	0.125	0.008	0.008
YW56	5 years	2022-05-25	Female	Yes	2017/7	>256	>256	>256	0.064	0.032	0.5	0.125	0.008	0.008
YW57	9 years 6 months	2022-05-28	Male	Yes	2013/3/5	>256	>256	>256	0.032	0.008	0.064	0.064	0.008	0.008
YW58	1 year 6 months	2022-06-11	Female	Yes	2021/1/7	>256	>256	>256	0.032	0.008	0.064	0.064	0.008	0.008
YW59	1 year 11 months	2022-06-14	Male	Yes	Unknow	>256	>256	>256	0.032	0.008	0.064	0.064	0.008	0.008
YW64	5 years 1 month	2022-08-07	Female	Yes	Unknow	>256	>256	>256	0.032	0.008	0.064	0.064	0.008	0.008
YW70	7 years 3 months	2023-05-17	Male	Yes	Unknow	>256	>256	>256	0.008	0.008	0.064	0.064	0.008	0.008
YW71	6 months	2023-06-26	Female	Yes	2023/3/8	>256	>256	>256	0.032	0.032	0.064	0.064	0.008	0.008
YW72	9 months	2023-08-10	Male	Yes	2022/12/14	>256	>256	>256	0.008	0.008	0.064	0.064	0.008	0.008
YW74	1 month	2023-08-17	Male	No	Unknow	>256	>256	>256	0.032	0.016	0.064	0.064	0.008	0.008
YW75	6 years 1 month	2023-08-27	Male	Yes	2017/10/27	>256	>256	>256	0.032	0.008	0.064	0.064	0.008	0.008
YW76	9 years 1 month	2023-08-30	Male	Yes	Unknow	>256	>256	>256	0.032	0.008	0.064	0.064	0.008	0.008
YW77	7 months	2023-09-12	Male	Yes	Unknow	>256	>256	>256	0.032	0.008	0.064	0.064	0.008	0.008
YW79	8 years 4 months	2023-10-15	Female	Yes	Unknow	>256	>256	>256	0.032	0.008	0.064	0.064	0.008	0.008
YW80	7 years 3 months	2023-10-20	Female	Yes	2016/9/13	>256	>256	>256	0.008	0.008	0.064	0.064	0.008	0.008
YW82	11 years 10 months	2023-10-28	Female	Yes	Unknow	>256	>256	>256	0.032	0.008	0.064	0.064	0.008	0.008
YW83	7 years 6 months	2023-10-30	Male	Yes	2016/6/17	>256	>256	>256	0.008	0.008	0.064	0.064	0.008	0.008
YW84	4 months	2023-11-10	Male	Yes	2023/10/19	>256	>256	>256	0.008	0.008	0.064	0.064	0.008	0.008
YW85	7 years	2023-11-08	Male	Yes	Unknow	>256	>256	>256	0.008	0.008	0.064	0.064	0.008	0.008
YW86	3 months	2023-11-13	Male	No	2024/5/6	>256	>256	>256	0.008	0.008	0.064	0.064	0.008	0.008
YW87	8 years	2023-11-14	Male	Yes	2016/1/27	>256	>256	>256	0.032	0.016	0.064	0.064	0.016	0.008
YW88	6 years 6 months	2023-11-22	Female	Yes	Unknow	>256	>256	>256	0.008	0.008	0.064	0.064	0.008	0.008
YW90	5 years 11 months	2023-12-19	Male	Yes	Unknow	>256	>256	>256	0.008	0.008	0.064	0.064	0.008	0.008
YW91	7 years 1 month	2023-12-29	Female	Yes	2017/2/14	>256	>256	>256	0.008	0.008	0.064	0.064	0.008	0.008
*Vaccination Status Prior to Illness: Indicates whether the patient was vaccinated before the onset of the illness.
	Yes: The patient received the vaccine before becoming ill.
	No: The patient did not receive the vaccine before becoming ill.
*Initial Vaccination Date: The date when the patient received the first dose of the vaccine.
	Date: The specific date of the first vaccination.
	Unknown: The vaccination date is either not recorded in the available data or the patient cannot provide an accurate recall of the date.

## Sheet: Table S2 
Table S2 Interspersed repetitive sequences of 63 Bordetella pertussis clinical isolates
Sample ID	Type	Number	Total Length(bp)	In Genome(%)	Average length(bp)
YW1	LTR	17	1912	0.0463	112
YW1	DNA	5	396	0.0096	79
YW1	LINE	6	562	0.0136	94
YW1	SINE	10	639	0.0155	64
YW1	RC	1	80	0.0019	80
YW1	Unknown	0	0	0	0
YW1	Total	39	3528	0.0854	92
YW10	LTR	17	1912	0.0463	112
YW10	DNA	4	289	0.007	72
YW10	LINE	6	562	0.0136	94
YW10	SINE	10	639	0.0155	64
YW10	RC	1	80	0.0019	80
YW10	Unknown	0	0	0	0
YW10	Total	38	3421	0.0828	92
YW11	LTR	17	1912	0.0461	112
YW11	DNA	5	396	0.0095	79
YW11	LINE	6	562	0.0135	94
YW11	SINE	10	639	0.0154	64
YW11	RC	1	80	0.0019	80
YW11	Unknown	0	0	0	0
YW11	Total	39	3528	0.085	92
YW12	LTR	17	1909	0.0462	112
YW12	DNA	5	396	0.0096	79
YW12	LINE	6	562	0.0136	94
YW12	SINE	10	639	0.0155	64
YW12	RC	1	80	0.0019	80
YW12	Unknown	0	0	0	0
YW12	Total	39	3525	0.0853	92
YW17	LTR	17	1912	0.0461	112
YW17	DNA	5	396	0.0095	79
YW17	LINE	6	562	0.0135	94
YW17	SINE	10	639	0.0154	64
YW17	RC	1	80	0.0019	80
YW17	Unknown	0	0	0	0
YW17	Total	39	3528	0.085	92
YW18	LTR	17	1911	0.0463	112
YW18	DNA	5	396	0.0096	79
YW18	LINE	6	562	0.0136	94
YW18	SINE	10	639	0.0155	64
YW18	RC	1	80	0.0019	80
YW18	Unknown	0	0	0	0
YW18	Total	39	3527	0.0854	92
YW19	LTR	17	1912	0.0463	112
YW19	DNA	5	396	0.0096	79
YW19	LINE	6	606	0.0147	101
YW19	SINE	10	639	0.0155	64
YW19	RC	1	80	0.0019	80
YW19	Unknown	0	0	0	0
YW19	Total	39	3572	0.0865	93
YW2	LTR	17	1912	0.0463	112
YW2	DNA	5	396	0.0096	79
YW2	LINE	6	562	0.0136	94
YW2	SINE	10	640	0.0155	64
YW2	RC	1	80	0.0019	80
YW2	Unknown	0	0	0	0
YW2	Total	39	3529	0.0854	92
YW20	LTR	17	1912	0.0463	112
YW20	DNA	5	396	0.0096	79
YW20	LINE	6	562	0.0136	94
YW20	SINE	10	639	0.0155	64
YW20	RC	1	80	0.0019	80
YW20	Unknown	0	0	0	0
YW20	Total	39	3528	0.0854	92
YW21	LTR	17	1912	0.0465	112
YW21	DNA	5	396	0.0096	79
YW21	LINE	5	428	0.0104	86
YW21	SINE	10	639	0.0155	64
YW21	RC	1	80	0.0019	80
YW21	Unknown	0	0	0	0
YW21	Total	38	3394	0.0826	91
YW23	LTR	17	1912	0.0463	112
YW23	DNA	5	396	0.0096	79
YW23	LINE	6	506	0.0123	84
YW23	SINE	10	639	0.0155	64
YW23	RC	1	80	0.0019	80
YW23	Unknown	0	0	0	0
YW23	Total	39	3472	0.0841	91
YW24	LTR	17	1913	0.0463	113
YW24	DNA	5	396	0.0096	79
YW24	LINE	6	606	0.0147	101
YW24	SINE	9	571	0.0138	63
YW24	RC	1	80	0.0019	80
YW24	Unknown	0	0	0	0
YW24	Total	38	3505	0.0848	94
YW25	LTR	18	1966	0.0466	109
YW25	DNA	5	396	0.0094	79
YW25	LINE	4	294	0.007	74
YW25	SINE	9	587	0.0139	65
YW25	RC	1	80	0.0019	80
YW25	Unknown	0	0	0	0
YW25	Total	37	3262	0.0773	90
YW26	LTR	17	1912	0.0462	112
YW26	DNA	5	396	0.0096	79
YW26	LINE	6	562	0.0136	94
YW26	SINE	9	587	0.0142	65
YW26	RC	1	80	0.0019	80
YW26	Unknown	0	0	0	0
YW26	Total	38	3476	0.0839	93
YW28	LTR	17	1911	0.0463	112
YW28	DNA	5	396	0.0096	79
YW28	LINE	6	562	0.0136	94
YW28	SINE	10	639	0.0155	64
YW28	RC	1	80	0.0019	80
YW28	Unknown	0	0	0	0
YW28	Total	39	3527	0.0854	92
YW29	LTR	17	1911	0.0461	112
YW29	DNA	5	396	0.0095	79
YW29	LINE	6	562	0.0135	94
YW29	SINE	10	639	0.0154	64
YW29	RC	1	80	0.0019	80
YW29	Unknown	0	0	0	0
YW29	Total	39	3527	0.085	92
YW31	LTR	17	1912	0.0463	112
YW31	DNA	5	396	0.0096	79
YW31	LINE	6	562	0.0136	94
YW31	SINE	10	639	0.0155	64
YW31	RC	1	80	0.0019	80
YW31	Unknown	0	0	0	0
YW31	Total	39	3528	0.0854	92
YW32	LTR	17	1912	0.0463	112
YW32	DNA	5	396	0.0096	79
YW32	LINE	6	561	0.0136	94
YW32	SINE	9	587	0.0142	65
YW32	RC	1	80	0.0019	80
YW32	Unknown	0	0	0	0
YW32	Total	38	3475	0.0841	93
YW34	LTR	17	1911	0.0463	112
YW34	DNA	5	396	0.0096	79
YW34	LINE	6	562	0.0136	94
YW34	SINE	10	621	0.0151	62
YW34	RC	1	80	0.0019	80
YW34	Unknown	0	0	0	0
YW34	Total	39	3509	0.0851	92
YW35	LTR	17	1912	0.0463	112
YW35	DNA	5	396	0.0096	79
YW35	LINE	6	562	0.0136	94
YW35	SINE	10	639	0.0155	64
YW35	RC	1	80	0.0019	80
YW35	Unknown	0	0	0	0
YW35	Total	39	3528	0.0854	92
YW36	LTR	17	1911	0.0461	112
YW36	DNA	5	396	0.0096	79
YW36	LINE	6	562	0.0136	94
YW36	SINE	12	770	0.0186	64
YW36	RC	1	80	0.0019	80
YW36	Unknown	0	0	0	0
YW36	Total	41	3658	0.0882	91
YW37	LTR	17	1914	0.0465	113
YW37	DNA	5	396	0.0096	79
YW37	LINE	6	562	0.0137	94
YW37	SINE	10	639	0.0155	64
YW37	RC	1	80	0.0019	80
YW37	Unknown	0	0	0	0
YW37	Total	39	3530	0.0858	92
YW38	LTR	17	1917	0.0466	113
YW38	DNA	5	396	0.0096	79
YW38	LINE	6	562	0.0137	94
YW38	SINE	10	639	0.0155	64
YW38	RC	1	80	0.0019	80
YW38	Unknown	0	0	0	0
YW38	Total	39	3533	0.0859	92
YW4	LTR	17	1912	0.0463	112
YW4	DNA	5	396	0.0096	79
YW4	LINE	6	562	0.0136	94
YW4	SINE	10	639	0.0155	64
YW4	RC	1	80	0.0019	80
YW4	Unknown	0	0	0	0
YW4	Total	39	3528	0.0853	92
YW40	LTR	17	1912	0.0464	112
YW40	DNA	5	396	0.0096	79
YW40	LINE	6	562	0.0136	94
YW40	SINE	10	639	0.0155	64
YW40	RC	1	80	0.0019	80
YW40	Unknown	0	0	0	0
YW40	Total	39	3528	0.0857	92
YW41	LTR	65	5966	0.1087	92
YW41	DNA	18	1253	0.0228	70
YW41	LINE	19	1396	0.0254	73
YW41	SINE	12	771	0.0141	64
YW41	RC	6	376	0.0069	63
YW41	Unknown	2	195	0.0036	98
YW41	Total	122	9694	0.1767	82
YW42	LTR	18	1976	0.0479	110
YW42	DNA	6	466	0.0113	78
YW42	LINE	6	562	0.0136	94
YW42	SINE	10	639	0.0155	64
YW42	RC	1	80	0.0019	80
YW42	Unknown	0	0	0	0
YW42	Total	41	3601	0.0873	91
YW43	LTR	17	1916	0.0464	113
YW43	DNA	5	396	0.0096	79
YW43	LINE	6	563	0.0136	94
YW43	SINE	10	639	0.0155	64
YW43	RC	1	80	0.0019	80
YW43	Unknown	0	0	0	0
YW43	Total	39	3533	0.0856	92
YW44	LTR	17	1912	0.0463	112
YW44	DNA	5	396	0.0096	79
YW44	LINE	6	562	0.0136	94
YW44	SINE	10	639	0.0155	64
YW44	RC	1	80	0.0019	80
YW44	Unknown	0	0	0	0
YW44	Total	39	3528	0.0855	92
YW49	LTR	17	1912	0.0465	112
YW49	DNA	5	396	0.0096	79
YW49	LINE	5	428	0.0104	86
YW49	SINE	10	639	0.0155	64
YW49	RC	1	80	0.0019	80
YW49	Unknown	0	0	0	0
YW49	Total	38	3394	0.0826	91
YW5	LTR	16	1767	0.0428	110
YW5	DNA	5	396	0.0096	79
YW5	LINE	6	562	0.0136	94
YW5	SINE	10	639	0.0155	64
YW5	RC	1	80	0.0019	80
YW5	Unknown	0	0	0	0
YW5	Total	38	3383	0.0819	91
YW50	LTR	17	1912	0.0463	112
YW50	DNA	5	396	0.0096	79
YW50	LINE	6	564	0.0136	94
YW50	SINE	10	639	0.0155	64
YW50	RC	1	80	0.0019	80
YW50	Unknown	0	0	0	0
YW50	Total	39	3530	0.0854	92
YW51	LTR	17	1913	0.0464	113
YW51	DNA	5	396	0.0096	79
YW51	LINE	6	562	0.0136	94
YW51	SINE	10	639	0.0155	64
YW51	RC	1	80	0.0019	80
YW51	Unknown	0	0	0	0
YW51	Total	39	3529	0.0856	92
YW53	LTR	17	1913	0.0463	113
YW53	DNA	5	396	0.0096	79
YW53	LINE	6	562	0.0136	94
YW53	SINE	10	639	0.0155	64
YW53	RC	1	80	0.0019	80
YW53	Unknown	0	0	0	0
YW53	Total	39	3529	0.0854	92
YW54	LTR	17	1916	0.0467	113
YW54	DNA	5	396	0.0096	79
YW54	LINE	6	562	0.0137	94
YW54	SINE	10	641	0.0156	64
YW54	RC	1	80	0.0019	80
YW54	Unknown	0	0	0	0
YW54	Total	39	3534	0.0861	92
YW55	LTR	17	1910	0.0461	112
YW55	DNA	5	396	0.0096	79
YW55	LINE	6	563	0.0136	94
YW55	SINE	10	639	0.0154	64
YW55	RC	1	80	0.0019	80
YW55	Unknown	0	0	0	0
YW55	Total	39	3527	0.0852	92
YW56	LTR	17	1916	0.0466	113
YW56	DNA	5	396	0.0096	79
YW56	LINE	6	562	0.0137	94
YW56	SINE	9	587	0.0143	65
YW56	RC	1	80	0.0019	80
YW56	Unknown	0	0	0	0
YW56	Total	38	3480	0.0847	93
YW57	LTR	17	1913	0.0465	113
YW57	DNA	5	396	0.0096	79
YW57	LINE	6	562	0.0137	94
YW57	SINE	10	638	0.0155	64
YW57	RC	1	80	0.0019	80
YW57	Unknown	0	0	0	0
YW57	Total	39	3528	0.0858	92
YW58	LTR	18	1946	0.0472	108
YW58	DNA	5	396	0.0096	79
YW58	LINE	6	562	0.0136	94
YW58	SINE	10	639	0.0155	64
YW58	RC	1	80	0.0019	80
YW58	Unknown	0	0	0	0
YW58	Total	40	3562	0.0864	91
YW59	LTR	17	1916	0.0465	113
YW59	DNA	5	396	0.0096	79
YW59	LINE	6	563	0.0137	94
YW59	SINE	10	639	0.0155	64
YW59	RC	1	80	0.0019	80
YW59	Unknown	0	0	0	0
YW59	Total	39	3533	0.0857	92
YW6	LTR	17	1912	0.0463	112
YW6	DNA	5	396	0.0096	79
YW6	LINE	6	562	0.0136	94
YW6	SINE	10	639	0.0155	64
YW6	RC	1	80	0.0019	80
YW6	Unknown	0	0	0	0
YW6	Total	39	3528	0.0854	92
YW64	LTR	17	1912	0.0465	112
YW64	DNA	5	396	0.0096	79
YW64	LINE	6	562	0.0137	94
YW64	SINE	10	639	0.0155	64
YW64	RC	1	80	0.0019	80
YW64	Unknown	0	0	0	0
YW64	Total	39	3528	0.0858	92
YW7	LTR	17	1911	0.0465	112
YW7	DNA	5	396	0.0096	79
YW7	LINE	6	562	0.0137	94
YW7	SINE	10	639	0.0155	64
YW7	RC	1	80	0.0019	80
YW7	Unknown	0	0	0	0
YW7	Total	39	3527	0.0858	92
YW70	LTR	16	1857	0.0452	116
YW70	DNA	5	396	0.0096	79
YW70	LINE	6	562	0.0137	94
YW70	SINE	10	639	0.0155	64
YW70	RC	1	80	0.0019	80
YW70	Unknown	0	0	0	0
YW70	Total	38	3473	0.0845	93
YW71	LTR	17	1912	0.0465	112
YW71	DNA	5	396	0.0096	79
YW71	LINE	6	562	0.0137	94
YW71	SINE	10	639	0.0155	64
YW71	RC	1	80	0.0019	80
YW71	Unknown	0	0	0	0
YW71	Total	39	3528	0.0857	92
YW72	LTR	17	1912	0.0464	112
YW72	DNA	5	396	0.0096	79
YW72	LINE	5	428	0.0104	86
YW72	SINE	10	639	0.0155	64
YW72	RC	1	80	0.0019	80
YW72	Unknown	0	0	0	0
YW72	Total	38	3394	0.0824	91
YW74	LTR	17	1912	0.0465	112
YW74	DNA	5	396	0.0096	79
YW74	LINE	6	562	0.0137	94
YW74	SINE	10	639	0.0155	64
YW74	RC	1	80	0.0019	80
YW74	Unknown	0	0	0	0
YW74	Total	39	3528	0.0858	92
YW75	LTR	17	1910	0.0464	112
YW75	DNA	5	396	0.0096	79
YW75	LINE	6	562	0.0136	94
YW75	SINE	10	639	0.0155	64
YW75	RC	1	80	0.0019	80
YW75	Unknown	0	0	0	0
YW75	Total	39	3526	0.0856	92
YW76	LTR	17	1913	0.0464	113
YW76	DNA	5	396	0.0096	79
YW76	LINE	6	562	0.0136	94
YW76	SINE	10	639	0.0155	64
YW76	RC	1	80	0.0019	80
YW76	Unknown	0	0	0	0
YW76	Total	39	3529	0.0857	92
YW77	LTR	17	1912	0.0466	112
YW77	DNA	5	396	0.0096	79
YW77	LINE	6	562	0.0137	94
YW77	SINE	10	640	0.0156	64
YW77	RC	1	80	0.0019	80
YW77	Unknown	0	0	0	0
YW77	Total	39	3529	0.0859	92
YW79	LTR	17	1912	0.0465	112
YW79	DNA	5	396	0.0096	79
YW79	LINE	6	562	0.0137	94
YW79	SINE	10	639	0.0156	64
YW79	RC	1	80	0.0019	80
YW79	Unknown	0	0	0	0
YW79	Total	39	3528	0.0859	92
YW8	LTR	17	1916	0.0463	113
YW8	DNA	5	396	0.0096	79
YW8	LINE	6	562	0.0136	94
YW8	SINE	10	639	0.0155	64
YW8	RC	1	80	0.0019	80
YW8	Unknown	0	0	0	0
YW8	Total	39	3532	0.0854	92
YW80	LTR	17	1912	0.0465	112
YW80	DNA	5	396	0.0096	79
YW80	LINE	6	562	0.0137	94
YW80	SINE	10	642	0.0156	64
YW80	RC	1	80	0.0019	80
YW80	Unknown	0	0	0	0
YW80	Total	39	3531	0.086	92
YW82	LTR	17	1913	0.0466	113
YW82	DNA	5	396	0.0096	79
YW82	LINE	6	562	0.0137	94
YW82	SINE	10	639	0.0156	64
YW82	RC	1	80	0.0019	80
YW82	Unknown	0	0	0	0
YW82	Total	39	3529	0.0859	92
YW83	LTR	17	1910	0.0465	112
YW83	DNA	5	396	0.0096	79
YW83	LINE	6	562	0.0137	94
YW83	SINE	10	639	0.0156	64
YW83	RC	1	80	0.0019	80
YW83	Unknown	0	0	0	0
YW83	Total	39	3526	0.0858	92
YW84	LTR	17	1912	0.0466	112
YW84	DNA	5	396	0.0096	79
YW84	LINE	6	562	0.0137	94
YW84	SINE	10	639	0.0156	64
YW84	RC	1	80	0.0019	80
YW84	Unknown	0	0	0	0
YW84	Total	39	3528	0.086	92
YW85	LTR	17	1911	0.0466	112
YW85	DNA	5	396	0.0096	79
YW85	LINE	6	562	0.0137	94
YW85	SINE	10	639	0.0156	64
YW85	RC	1	80	0.0019	80
YW85	Unknown	0	0	0	0
YW85	Total	39	3527	0.0859	92
YW86	LTR	17	1912	0.0466	112
YW86	DNA	5	396	0.0096	79
YW86	LINE	6	562	0.0137	94
YW86	SINE	10	639	0.0156	64
YW86	RC	1	80	0.0019	80
YW86	Unknown	0	0	0	0
YW86	Total	39	3528	0.0859	92
YW87	LTR	16	1833	0.0446	115
YW87	DNA	5	396	0.0096	79
YW87	LINE	6	562	0.0137	94
YW87	SINE	10	639	0.0156	64
YW87	RC	1	80	0.0019	80
YW87	Unknown	0	0	0	0
YW87	Total	38	3449	0.084	92
YW88	LTR	17	1912	0.0466	112
YW88	DNA	5	396	0.0096	79
YW88	LINE	6	562	0.0137	94
YW88	SINE	10	639	0.0156	64
YW88	RC	1	80	0.0019	80
YW88	Unknown	0	0	0	0
YW88	Total	39	3528	0.0859	92
YW9	LTR	17	1912	0.0463	112
YW9	DNA	5	396	0.0096	79
YW9	LINE	6	562	0.0136	94
YW9	SINE	10	639	0.0155	64
YW9	RC	1	80	0.0019	80
YW9	Unknown	0	0	0	0
YW9	Total	39	3528	0.0854	92
YW90	LTR	17	1915	0.0466	113
YW90	DNA	5	396	0.0096	79
YW90	LINE	6	562	0.0137	94
YW90	SINE	9	586	0.0143	65
YW90	RC	1	80	0.0019	80
YW90	Unknown	0	0	0	0
YW90	Total	38	3478	0.0847	93
YW91	LTR	17	1912	0.0466	112
YW91	DNA	5	396	0.0096	79
YW91	LINE	5	432	0.0105	86
YW91	SINE	10	638	0.0155	64
YW91	RC	1	80	0.0019	80
YW91	Unknown	0	0	0	0
YW91	Total	38	3397	0.0828	91

## Sheet: Table S3
Table S3 Tandom repeat of 63 Bordetella pertussis clinical isolates
Sample ID	Type	Number	Repeat Size(bp)	Total Length(bp)	In Genome(%)
YW1	TR	265	5~1,055	42562	1.0307
YW1	Minisatellite DNA	218	10~57	9951	0.241
YW1	Microsatellite DNA	9	5~6	391	0.0095
YW10	TR	266	5~1,050	48541	1.1752
YW10	Minisatellite DNA	217	10~57	9903	0.2398
YW10	Microsatellite DNA	9	5~6	391	0.0095
YW11	TR	265	5~1,052	44377	1.0698
YW11	Minisatellite DNA	218	10~57	9957	0.24
YW11	Microsatellite DNA	9	5~6	391	0.0094
YW12	TR	264	5~1,051	44367	1.0742
YW12	Minisatellite DNA	217	10~57	9924	0.2403
YW12	Microsatellite DNA	9	5~6	396	0.0096
YW17	TR	273	5~1,050	48886	1.1783
YW17	Minisatellite DNA	223	10~57	10151	0.2447
YW17	Microsatellite DNA	9	5~6	391	0.0094
YW18	TR	271	1~1,053	46597	1.1288
YW18	Minisatellite DNA	220	10~57	10051	0.2435
YW18	Microsatellite DNA	9	5~6	391	0.0095
YW19	TR	264	1~1,051	42282	1.0234
YW19	Minisatellite DNA	217	10~57	9924	0.2402
YW19	Microsatellite DNA	9	5~6	391	0.0095
YW2	TR	264	5~1,054	44383	1.0741
YW2	Minisatellite DNA	217	10~57	9924	0.2402
YW2	Microsatellite DNA	9	5~6	391	0.0095
YW20	TR	264	5~1,051	44389	1.0744
YW20	Minisatellite DNA	217	10~57	9936	0.2405
YW20	Microsatellite DNA	8	5~6	308	0.0075
YW21	TR	263	5~1,057	43253	1.0525
YW21	Minisatellite DNA	218	10~57	9828	0.2391
YW21	Microsatellite DNA	9	5~6	407	0.0099
YW23	TR	264	5~1,059	44373	1.0743
YW23	Minisatellite DNA	217	10~57	9924	0.2403
YW23	Microsatellite DNA	9	5~6	391	0.0095
YW24	TR	265	5~1,053	44379	1.074
YW24	Minisatellite DNA	218	10~57	9955	0.2409
YW24	Microsatellite DNA	9	5~6	391	0.0095
YW25	TR	274	5~1,052	44817	1.0615
YW25	Minisatellite DNA	226	10~57	10369	0.2456
YW25	Microsatellite DNA	9	5~6	391	0.0093
YW26	TR	261	1~1,056	34022	0.8212
YW26	Minisatellite DNA	218	10~57	9958	0.2404
YW26	Microsatellite DNA	9	5~6	391	0.0094
YW28	TR	263	5~1,055	42276	1.0238
YW28	Minisatellite DNA	217	10~57	9924	0.2403
YW28	Microsatellite DNA	9	5~6	391	0.0095
YW29	TR	270	1~1,050	50131	1.2087
YW29	Minisatellite DNA	218	10~57	9969	0.2404
YW29	Microsatellite DNA	9	5~6	391	0.0094
YW31	TR	264	5~1,050	44358	1.074
YW31	Minisatellite DNA	217	10~57	9924	0.2403
YW31	Microsatellite DNA	9	5~6	391	0.0095
YW32	TR	265	5~1,053	46470	1.1251
YW32	Minisatellite DNA	217	10~57	9924	0.2403
YW32	Microsatellite DNA	9	5~6	391	0.0095
YW34	TR	262	5~1,055	39077	0.9473
YW34	Minisatellite DNA	219	10~57	9858	0.239
YW34	Microsatellite DNA	9	5~6	401	0.0097
YW35	TR	263	5~1,056	42221	1.0222
YW35	Minisatellite DNA	217	10~57	9924	0.2403
YW35	Microsatellite DNA	9	5~6	391	0.0095
YW36	TR	259	5~1,052	33842	0.8164
YW36	Minisatellite DNA	217	10~57	9923	0.2394
YW36	Microsatellite DNA	9	5~6	391	0.0094
YW37	TR	269	5~1,052	47670	1.1582
YW37	Minisatellite DNA	222	10~57	10008	0.2432
YW37	Microsatellite DNA	9	5~6	401	0.0097
YW38	TR	266	5~1,059	39161	0.9526
YW38	Minisatellite DNA	222	10~57	9956	0.2422
YW38	Microsatellite DNA	9	5~6	401	0.0098
YW4	TR	265	5~1,052	46449	1.1237
YW4	Minisatellite DNA	217	10~57	9924	0.2401
YW4	Microsatellite DNA	9	5~6	391	0.0095
YW40	TR	266	2~1,052	46537	1.1298
YW40	Minisatellite DNA	217	10~57	9984	0.2424
YW40	Microsatellite DNA	10	2~6	422	0.0102
YW41	TR	333	1~1,178	50158	0.9141
YW41	Minisatellite DNA	265	10~57	12392	0.2258
YW41	Microsatellite DNA	22	4~6	1422	0.0259
YW42	TR	269	5~1,051	43552	1.056
YW42	Minisatellite DNA	225	10~57	10119	0.2453
YW42	Microsatellite DNA	9	5~6	406	0.0098
YW43	TR	266	5~1,055	40255	0.9748
YW43	Minisatellite DNA	220	10~57	10041	0.2432
YW43	Microsatellite DNA	9	5~6	391	0.0095
YW44	TR	272	5~1,052	49783	1.2061
YW44	Minisatellite DNA	225	10~57	10085	0.2443
YW44	Microsatellite DNA	9	5~6	406	0.0098
YW49	TR	268	5~1,056	45584	1.1092
YW49	Minisatellite DNA	223	10~57	10047	0.2445
YW49	Microsatellite DNA	9	5~6	401	0.0098
YW5	TR	262	5~1,055	40162	0.9726
YW5	Minisatellite DNA	217	10~57	9924	0.2403
YW5	Microsatellite DNA	9	5~6	391	0.0095
YW50	TR	262	5~1,055	40163	0.9719
YW50	Minisatellite DNA	216	10~57	9870	0.2388
YW50	Microsatellite DNA	9	5~6	391	0.0095
YW51	TR	263	5~1,055	39139	0.949
YW51	Minisatellite DNA	221	10~57	9945	0.2411
YW51	Microsatellite DNA	9	5~6	401	0.0097
YW53	TR	257	5~1,057	27565	0.6674
YW53	Minisatellite DNA	217	10~57	9924	0.2403
YW53	Microsatellite DNA	9	5~6	391	0.0095
YW54	TR	260	1~1,052	28627	0.6973
YW54	Minisatellite DNA	221	10~57	9908	0.2414
YW54	Microsatellite DNA	9	5~6	401	0.0098
YW55	TR	256	5~1,053	27559	0.6657
YW55	Minisatellite DNA	217	10~57	9924	0.2397
YW55	Microsatellite DNA	9	5~6	391	0.0094
YW56	TR	265	1~1,051	37190	0.9054
YW56	Minisatellite DNA	223	10~57	10052	0.2447
YW56	Microsatellite DNA	9	5~6	401	0.0098
YW57	TR	265	5~1,053	45327	1.102
YW57	Minisatellite DNA	221	10~57	9977	0.2426
YW57	Microsatellite DNA	9	5~6	406	0.0099
YW58	TR	265	5~1,052	45396	1.1006
YW58	Minisatellite DNA	220	10~57	9887	0.2397
YW58	Microsatellite DNA	9	5~6	401	0.0097
YW59	TR	271	5~1,055	49867	1.2099
YW59	Minisatellite DNA	224	10~57	10120	0.2455
YW59	Microsatellite DNA	9	5~6	401	0.0097
YW6	TR	265	5~1,058	46473	1.125
YW6	Minisatellite DNA	217	10~57	9924	0.2402
YW6	Microsatellite DNA	9	5~6	391	0.0095
YW64	TR	261	1~1,053	30807	0.7496
YW64	Minisatellite DNA	221	10~57	9952	0.2422
YW64	Microsatellite DNA	9	5~6	401	0.0098
YW7	TR	269	5~1,050	47672	1.1598
YW7	Minisatellite DNA	223	10~60	10061	0.2448
YW7	Microsatellite DNA	9	5~6	389	0.0095
YW70	TR	266	1~1,052	39178	0.9533
YW70	Minisatellite DNA	221	10~57	9903	0.241
YW70	Microsatellite DNA	10	5~6	435	0.0106
YW71	TR	263	5~1,055	44678	1.0856
YW71	Minisatellite DNA	218	10~57	9828	0.2388
YW71	Microsatellite DNA	9	5~6	401	0.0097
YW72	TR	262	5~1,051	37094	0.9004
YW72	Minisatellite DNA	221	10~57	10015	0.2431
YW72	Microsatellite DNA	9	5~6	401	0.0097
YW74	TR	262	5~1,053	46346	1.1271
YW74	Minisatellite DNA	217	10~57	9798	0.2383
YW74	Microsatellite DNA	9	5~6	401	0.0098
YW75	TR	263	5~1,052	43246	1.0499
YW75	Minisatellite DNA	219	10~57	9862	0.2394
YW75	Microsatellite DNA	9	5~6	401	0.0097
YW76	TR	261	5~1,054	41147	0.9988
YW76	Minisatellite DNA	218	10~57	9840	0.2388
YW76	Microsatellite DNA	8	5~6	322	0.0078
YW77	TR	267	3~1,051	42408	1.0327
YW77	Minisatellite DNA	222	10~57	10010	0.2438
YW77	Microsatellite DNA	10	3~6	433	0.0105
YW79	TR	262	5~1,058	43201	1.0514
YW79	Minisatellite DNA	218	10~57	9786	0.2382
YW79	Microsatellite DNA	9	5~6	401	0.0098
YW8	TR	270	5~1,054	44678	1.0803
YW8	Minisatellite DNA	223	10~57	10151	0.2455
YW8	Microsatellite DNA	9	5~6	391	0.0095
YW80	TR	268	1~1,056	43506	1.0591
YW80	Minisatellite DNA	223	10~57	10039	0.2444
YW80	Microsatellite DNA	9	5~6	401	0.0098
YW82	TR	263	5~1,054	37138	0.904
YW82	Minisatellite DNA	222	10~57	10008	0.2436
YW82	Microsatellite DNA	9	5~6	413	0.0101
YW83	TR	264	5~1,056	35069	0.8537
YW83	Minisatellite DNA	223	10~57	10041	0.2444
YW83	Microsatellite DNA	9	5~6	410	0.01
YW84	TR	255	5~1,049	31585	0.7696
YW84	Minisatellite DNA	216	10~57	9756	0.2377
YW84	Microsatellite DNA	9	5~6	400	0.0097
YW85	TR	261	5~1,054	34061	0.8298
YW85	Minisatellite DNA	220	10~57	9882	0.2407
YW85	Microsatellite DNA	9	5~6	401	0.0098
YW86	TR	259	1~1,054	34792	0.8474
YW86	Minisatellite DNA	217	10~57	9747	0.2374
YW86	Microsatellite DNA	9	5~6	401	0.0098
YW87	TR	259	1~1,060	34822	0.8478
YW87	Minisatellite DNA	217	10~57	9795	0.2385
YW87	Microsatellite DNA	9	5~6	401	0.0098
YW88	TR	260	5~1,056	41058	0.9998
YW88	Minisatellite DNA	217	10~57	9763	0.2377
YW88	Microsatellite DNA	9	5~6	401	0.0098
YW9	TR	265	5~1,056	46481	1.1257
YW9	Minisatellite DNA	217	10~57	9924	0.2404
YW9	Microsatellite DNA	9	5~6	391	0.0095
YW90	TR	259	5~1,052	34839	0.8484
YW90	Minisatellite DNA	219	10~57	9868	0.2403
YW90	Microsatellite DNA	9	5~6	401	0.0098
YW91	TR	258	5~1,052	32725	0.7974
YW91	Minisatellite DNA	219	10~57	9859	0.2402
YW91	Microsatellite DNA	9	5~6	401	0.0098

## Sheet: Table S4
Table S4 Non-coding RNA of 63 Bordetella pertussis clinical isolates
Sample ID	Type	Number	Average length(bp)	Total length(bp)
YW1	tRNA	51	78	3997
YW1	5s(denovo)	3	112	336
YW1	16s(denovo)	3	1519	4556
YW1	23s(denovo)	3	2883	8648
YW1	sRNA	0	0	0
YW10	tRNA	51	78	3997
YW10	5s(denovo)	3	112	336
YW10	16s(denovo)	3	1519	4556
YW10	23s(denovo)	3	2880	8639
YW10	sRNA	0	0	0
YW11	tRNA	51	78	3997
YW11	5s(denovo)	3	112	336
YW11	16s(denovo)	3	1519	4558
YW11	23s(denovo)	3	2879	8637
YW11	sRNA	0	0	0
YW12	tRNA	51	78	3997
YW12	5s(denovo)	3	112	336
YW12	16s(denovo)	3	1519	4557
YW12	23s(denovo)	3	2879	8636
YW12	sRNA	0	0	0
YW17	tRNA	52	78	4073
YW17	5s(denovo)	3	112	336
YW17	16s(denovo)	3	1521	4562
YW17	23s(denovo)	3	2880	8639
YW17	sRNA	0	0	0
YW18	tRNA	51	78	3997
YW18	5s(denovo)	3	112	336
YW18	16s(denovo)	3	1519	4558
YW18	23s(denovo)	3	2881	8642
YW18	sRNA	0	0	0
YW19	tRNA	51	78	3997
YW19	5s(denovo)	3	112	336
YW19	16s(denovo)	3	1521	4563
YW19	23s(denovo)	3	2882	8647
YW19	sRNA	0	0	0
YW2	tRNA	51	78	3998
YW2	5s(denovo)	3	112	336
YW2	16s(denovo)	3	1519	4557
YW2	23s(denovo)	3	2881	8642
YW2	sRNA	0	0	0
YW20	tRNA	51	78	3997
YW20	5s(denovo)	3	112	336
YW20	16s(denovo)	3	1522	4565
YW20	23s(denovo)	3	2882	8647
YW20	sRNA	0	0	0
YW21	tRNA	51	78	3997
YW21	5s(denovo)	3	112	336
YW21	16s(denovo)	3	1524	4571
YW21	23s(denovo)	3	2881	8644
YW21	sRNA	0	0	0
YW23	tRNA	51	78	3997
YW23	5s(denovo)	3	112	336
YW23	16s(denovo)	3	1518	4554
YW23	23s(denovo)	3	2886	8657
YW23	sRNA	0	0	0
YW24	tRNA	51	78	3996
YW24	5s(denovo)	3	112	336
YW24	16s(denovo)	3	1520	4560
YW24	23s(denovo)	3	2883	8650
YW24	sRNA	0	0	0
YW25	tRNA	51	78	3996
YW25	5s(denovo)	3	112	336
YW25	16s(denovo)	3	1521	4564
YW25	23s(denovo)	3	2881	8642
YW25	sRNA	0	0	0
YW26	tRNA	52	78	4088
YW26	5s(denovo)	3	112	336
YW26	16s(denovo)	3	1518	4554
YW26	23s(denovo)	3	2883	8649
YW26	sRNA	0	0	0
YW28	tRNA	51	78	3997
YW28	5s(denovo)	3	112	336
YW28	16s(denovo)	3	1520	4559
YW28	23s(denovo)	3	2881	8644
YW28	sRNA	0	0	0
YW29	tRNA	51	78	3997
YW29	5s(denovo)	3	112	336
YW29	16s(denovo)	3	1520	4560
YW29	23s(denovo)	3	2879	8638
YW29	sRNA	0	0	0
YW31	tRNA	51	78	3997
YW31	5s(denovo)	3	112	336
YW31	16s(denovo)	3	1520	4560
YW31	23s(denovo)	3	2880	8641
YW31	sRNA	0	0	0
YW32	tRNA	51	78	3999
YW32	5s(denovo)	3	112	336
YW32	16s(denovo)	3	1518	4555
YW32	23s(denovo)	3	2880	8641
YW32	sRNA	0	0	0
YW34	tRNA	51	78	4001
YW34	5s(denovo)	3	112	336
YW34	16s(denovo)	3	1520	4561
YW34	23s(denovo)	3	2882	8646
YW34	sRNA	0	0	0
YW35	tRNA	51	78	3997
YW35	5s(denovo)	3	112	336
YW35	16s(denovo)	3	1520	4560
YW35	23s(denovo)	3	2880	8641
YW35	sRNA	0	0	0
YW36	tRNA	53	78	4150
YW36	5s(denovo)	3	112	337
YW36	16s(denovo)	4	1520	6081
YW36	23s(denovo)	3	2882	8645
YW36	sRNA	0	0	0
YW37	tRNA	51	78	3997
YW37	5s(denovo)	3	112	336
YW37	16s(denovo)	3	1518	4555
YW37	23s(denovo)	3	2882	8647
YW37	sRNA	0	0	0
YW38	tRNA	51	78	3997
YW38	5s(denovo)	3	112	336
YW38	16s(denovo)	3	1522	4566
YW38	23s(denovo)	3	2882	8647
YW38	sRNA	0	0	0
YW4	tRNA	51	78	3997
YW4	5s(denovo)	3	112	336
YW4	16s(denovo)	3	1519	4558
YW4	23s(denovo)	3	2879	8638
YW4	sRNA	0	0	0
YW40	tRNA	51	78	3997
YW40	5s(denovo)	3	112	336
YW40	16s(denovo)	3	1519	4558
YW40	23s(denovo)	3	2883	8648
YW40	sRNA	0	0	0
YW41	tRNA	86	78	6783
YW41	5s(denovo)	8	114	910
YW41	16s(denovo)	7	1524	10667
YW41	23s(denovo)	7	2982	20877
YW41	sRNA	1	86	86
YW42	tRNA	52	78	4071
YW42	5s(denovo)	3	112	336
YW42	16s(denovo)	3	1522	4567
YW42	23s(denovo)	3	2881	8643
YW42	sRNA	0	0	0
YW43	tRNA	51	78	3997
YW43	5s(denovo)	3	112	336
YW43	16s(denovo)	3	1520	4561
YW43	23s(denovo)	3	2883	8649
YW43	sRNA	0	0	0
YW44	tRNA	51	78	3997
YW44	5s(denovo)	3	112	336
YW44	16s(denovo)	3	1521	4563
YW44	23s(denovo)	3	2884	8652
YW44	sRNA	0	0	0
YW49	tRNA	51	78	3994
YW49	5s(denovo)	3	112	336
YW49	16s(denovo)	3	1520	4559
YW49	23s(denovo)	3	2880	8639
YW49	sRNA	0	0	0
YW5	tRNA	51	78	3997
YW5	5s(denovo)	3	112	336
YW5	16s(denovo)	3	1519	4556
YW5	23s(denovo)	3	2884	8651
YW5	sRNA	0	0	0
YW50	tRNA	51	78	3997
YW50	5s(denovo)	3	112	336
YW50	16s(denovo)	3	1520	4561
YW50	23s(denovo)	3	2881	8642
YW50	sRNA	0	0	0
YW51	tRNA	51	78	3997
YW51	5s(denovo)	3	112	336
YW51	16s(denovo)	3	1519	4556
YW51	23s(denovo)	3	2881	8643
YW51	sRNA	0	0	0
YW53	tRNA	51	78	3998
YW53	5s(denovo)	3	112	337
YW53	16s(denovo)	3	1520	4560
YW53	23s(denovo)	3	2881	8644
YW53	sRNA	0	0	0
YW54	tRNA	51	78	3999
YW54	5s(denovo)	3	112	336
YW54	16s(denovo)	3	1519	4556
YW54	23s(denovo)	3	2882	8647
YW54	sRNA	0	0	0
YW55	tRNA	51	78	3997
YW55	5s(denovo)	3	112	336
YW55	16s(denovo)	3	1520	4560
YW55	23s(denovo)	3	2880	8641
YW55	sRNA	0	0	0
YW56	tRNA	51	78	3999
YW56	5s(denovo)	3	112	335
YW56	16s(denovo)	3	1520	4561
YW56	23s(denovo)	3	2881	8644
YW56	sRNA	0	0	0
YW57	tRNA	51	78	3997
YW57	5s(denovo)	3	112	336
YW57	16s(denovo)	3	1520	4559
YW57	23s(denovo)	3	2879	8638
YW57	sRNA	0	0	0
YW58	tRNA	51	78	3997
YW58	5s(denovo)	3	113	338
YW58	16s(denovo)	3	1518	4555
YW58	23s(denovo)	3	2881	8644
YW58	sRNA	0	0	0
YW59	tRNA	51	78	3997
YW59	5s(denovo)	3	112	336
YW59	16s(denovo)	3	1520	4559
YW59	23s(denovo)	3	2889	8666
YW59	sRNA	0	0	0
YW6	tRNA	51	78	3997
YW6	5s(denovo)	3	112	336
YW6	16s(denovo)	3	1523	4568
YW6	23s(denovo)	3	2882	8646
YW6	sRNA	0	0	0
YW64	tRNA	51	78	3997
YW64	5s(denovo)	3	112	336
YW64	16s(denovo)	3	1519	4556
YW64	23s(denovo)	3	2882	8647
YW64	sRNA	0	0	0
YW7	tRNA	51	78	3997
YW7	5s(denovo)	3	112	336
YW7	16s(denovo)	3	1519	4557
YW7	23s(denovo)	3	2880	8641
YW7	sRNA	0	0	0
YW70	tRNA	51	78	3996
YW70	5s(denovo)	3	112	337
YW70	16s(denovo)	3	1521	4563
YW70	23s(denovo)	3	2884	8653
YW70	sRNA	0	0	0
YW71	tRNA	51	78	3997
YW71	5s(denovo)	3	112	336
YW71	16s(denovo)	3	1521	4563
YW71	23s(denovo)	3	2883	8648
YW71	sRNA	0	0	0
YW72	tRNA	51	78	3997
YW72	5s(denovo)	3	112	336
YW72	16s(denovo)	3	1520	4561
YW72	23s(denovo)	3	2888	8663
YW72	sRNA	0	0	0
YW74	tRNA	51	78	3997
YW74	5s(denovo)	3	112	336
YW74	16s(denovo)	3	1519	4557
YW74	23s(denovo)	3	2881	8644
YW74	sRNA	0	0	0
YW75	tRNA	51	78	3997
YW75	5s(denovo)	3	112	336
YW75	16s(denovo)	3	1521	4564
YW75	23s(denovo)	3	2881	8642
YW75	sRNA	0	0	0
YW76	tRNA	51	78	3997
YW76	5s(denovo)	3	112	336
YW76	16s(denovo)	3	1520	4560
YW76	23s(denovo)	3	2883	8648
YW76	sRNA	0	0	0
YW77	tRNA	51	78	3998
YW77	5s(denovo)	3	112	336
YW77	16s(denovo)	3	1521	4564
YW77	23s(denovo)	3	2879	8638
YW77	sRNA	0	0	0
YW79	tRNA	51	78	4001
YW79	5s(denovo)	3	112	336
YW79	16s(denovo)	3	1519	4558
YW79	23s(denovo)	3	2879	8637
YW79	sRNA	0	0	0
YW8	tRNA	51	78	3997
YW8	5s(denovo)	3	112	336
YW8	16s(denovo)	3	1518	4555
YW8	23s(denovo)	3	2880	8639
YW8	sRNA	0	0	0
YW80	tRNA	51	78	4001
YW80	5s(denovo)	3	112	336
YW80	16s(denovo)	3	1520	4559
YW80	23s(denovo)	3	2884	8651
YW80	sRNA	0	0	0
YW82	tRNA	51	78	3997
YW82	5s(denovo)	3	112	336
YW82	16s(denovo)	3	1519	4558
YW82	23s(denovo)	3	2887	8661
YW82	sRNA	0	0	0
YW83	tRNA	51	78	3997
YW83	5s(denovo)	3	113	340
YW83	16s(denovo)	3	1524	4573
YW83	23s(denovo)	3	2879	8638
YW83	sRNA	0	0	0
YW84	tRNA	52	78	4088
YW84	5s(denovo)	3	112	336
YW84	16s(denovo)	3	1519	4556
YW84	23s(denovo)	3	2881	8643
YW84	sRNA	0	0	0
YW85	tRNA	51	78	3997
YW85	5s(denovo)	3	112	336
YW85	16s(denovo)	3	1521	4564
YW85	23s(denovo)	3	2884	8651
YW85	sRNA	0	0	0
YW86	tRNA	51	78	3997
YW86	5s(denovo)	3	112	336
YW86	16s(denovo)	3	1518	4555
YW86	23s(denovo)	3	2883	8649
YW86	sRNA	0	0	0
YW87	tRNA	51	78	3997
YW87	5s(denovo)	3	112	336
YW87	16s(denovo)	3	1522	4565
YW87	23s(denovo)	3	2881	8643
YW87	sRNA	0	0	0
YW88	tRNA	51	78	3997
YW88	5s(denovo)	3	112	336
YW88	16s(denovo)	3	1519	4558
YW88	23s(denovo)	3	2880	8641
YW88	sRNA	0	0	0
YW9	tRNA	51	78	3997
YW9	5s(denovo)	3	112	336
YW9	16s(denovo)	3	1520	4559
YW9	23s(denovo)	3	2882	8645
YW9	sRNA	0	0	0
YW90	tRNA	51	78	3995
YW90	5s(denovo)	3	112	336
YW90	16s(denovo)	3	1520	4559
YW90	23s(denovo)	3	2883	8650
YW90	sRNA	0	0	0
YW91	tRNA	51	78	3996
YW91	5s(denovo)	3	112	336
YW91	16s(denovo)	3	1522	4566
YW91	23s(denovo)	3	2881	8644
YW91	sRNA	0	0	0

## Sheet: Table S5
Table S5 Genomic islands of 63 Bordetella pertussis clinical isolates
Sample ID	GIs number	GIs total length(bp)	Average length(bp)
YW1	28	269931	9640
YW10	27	321199	11896
YW11	29	311782	10751
YW12	30	324852	10828
YW17	26	316606	12177
YW18	27	293651	10876
YW19	30	316095	10536
YW2	26	260148	10006
YW20	29	312766	10785
YW21	31	310044	10001
YW23	30	316969	10566
YW24	28	285432	10194
YW25	28	305016	10893
YW26	25	275759	11030
YW28	29	312389	10772
YW29	31	337219	10878
YW31	28	316061	11288
YW32	26	289331	11128
YW34	31	313137	10101
YW35	28	283450	10123
YW36	27	293783	10881
YW37	23	293164	12746
YW38	24	272425	11351
YW4	27	312276	11566
YW40	29	313992	10827
YW41	26	297752	11452
YW42	25	299665	11987
YW43	28	314851	11245
YW44	27	306487	11351
YW49	24	280718	11697
YW5	26	316948	12190
YW50	28	300691	10739
YW51	31	316767	10218
YW53	27	268435	9942
YW54	25	265242	10610
YW55	27	298953	11072
YW56	27	318689	11803
YW57	26	300401	11554
YW58	27	317867	11773
YW59	23	256196	11139
YW6	30	312296	10410
YW64	29	320070	11037
YW7	26	308778	11876
YW70	26	282191	10854
YW71	27	291147	10783
YW72	23	238010	10348
YW74	28	274668	9810
YW75	27	293184	10859
YW76	26	288112	11081
YW77	23	290696	12639
YW79	25	257517	10301
YW8	24	286260	11928
YW80	25	289313	11573
YW82	24	307701	12821
YW83	26	324641	12486
YW84	28	307416	10979
YW85	28	298037	10644
YW86	27	293104	10856
YW87	24	252466	10519
YW88	30	315420	10514
YW9	26	315801	12146
YW90	28	305428	10908
YW91	25	296886	11875

## Sheet: Table S6
Table S6 Prophages of 63 Bordetella pertussis clinical isolates
Sample_ID	Prophage_Num	Total_Length(bp)	Average_Length(bp)
YW1	25	1141638	45666
YW10	14	631464	45105
YW11	28	1455417	51979
YW12	9	421171	46797
YW17	23	966698	42030
YW18	16	658205	41138
YW19	29	1458812	50304
YW2	27	1253767	46436
YW20	10	364899	36490
YW21	31	1424431	45949
YW23	29	1370030	47242
YW24	32	1468966	45905
YW25	14	672502	48036
YW26	11	461816	41983
YW28	27	1289914	47775
YW29	14	554338	39596
YW31	27	1306608	48393
YW32	11	461337	41940
YW34	19	868947	45734
YW35	25	1175552	47022
YW36	28	1208661	43167
YW37	17	748275	44016
YW38	13	677422	52109
YW4	32	1473915	46060
YW40	28	1315543	46984
YW41	17	814271	47898
YW42	27	1251343	46346
YW43	35	1565083	44717
YW44	33	1636090	49579
YW49	12	671716	55976
YW5	12	497766	41481
YW50	14	581926	41566
YW51	29	1407001	48517
YW53	28	1465115	52326
YW54	29	1384406	47738
YW55	30	1501203	50040
YW56	32	1563132	48848
YW57	29	1432012	49380
YW58	26	1129926	43459
YW59	34	1622759	47728
YW6	30	1493055	49769
YW64	32	1469669	45927
YW7	16	734600	45913
YW70	29	1403013	48380
YW71	31	1534138	49488
YW72	29	1381811	47649
YW74	35	1619493	46271
YW75	29	1537111	53004
YW76	18	779558	43309
YW77	24	954302	39763
YW79	15	662194	44146
YW8	20	859723	42986
YW80	30	1383318	46111
YW82	26	1223652	47064
YW83	30	1493699	49790
YW84	30	1210380	40346
YW85	34	1601148	47093
YW86	30	1471495	49050
YW87	27	1232178	45636
YW88	31	1566608	50536
YW9	14	628999	44929
YW90	31	1433252	46234
YW91	16	671712	41982

## Sheet: Table S7
Table S7 Gene typing of pertussis vaccine antigen components in 77 Bordetella pertussis isolates
Sample ID	ptxP	ptxA	ptxB	ptxC	ptxD	ptxE	fhaB	fim2	fim3
10013_B3582	3	1	1	4	1	4	1	1	2
10144_FR4953	3	1	1	4	1	4	1	1	2
10408_5456_P2M	2	4	1	1	1	4	2	2	1
10459_FR6115	3	1	1	4	1	4	1	1	1
10527_TN0006	3	1	1	4	1	4	1	1	2
11590_FR6597	1	1	1	1	1	4	1	3	4
2052_L15189	1	1	1	1	1	4	3	1	1
2076_L13030	3	1	1	4	1	4	1	1	1
2078_L13055	1	1	1	1	1	4	3	1	1
2093_L14260	3	1	1	4	1	4	1	1	2
507_Tohama_I	1	2	1	1	1	4	1	1	1
527_A371	1	1	1	1	1	4		1	1
533_B203	2	4	1	1	1	4	2	2	1
566_H617	3	1	1	4	1	4	1	1	1
YW1			1		1	4	3	1	1
YW2	1	1	1	1	1	4	3	1	1
YW4	1	1	1	1	1	4	3	1	1
YW5	1	1	1	1	1	4	3	1	1
YW6	1	1	1	1	1	4	3	1	1
YW7	3	1	1	4	1	4	1	1	1
YW8	1	1	1	1	1	4	3	1	1
YW9	1	1	1	1	1	4	3	1	1
YW10	1	1	1	1	1	4	3	1	1
YW11	1	1	1	1	1	4	3	1	1
YW12	1	1	1	1	1	4	3	1	1
YW17	1	1	1	1	1	4	3	1	1
YW18	1	1	1	1	1	4	3	1	1
YW19	1	1	1	1	1	4	3	1	1
YW20	1	1	1	1	1	4	3	1	1
YW21	3	1	1	4	1	4	1	1	1
YW23	1	1	1	1	1	4	3	1	1
YW24	1	1	1	1	1	4	3	1	1
YW25	1	1	1	1	1	4	3	1	1
YW26	1	1	1	1	1	4	3	1	1
YW28	1	1	1	1	1	4	3	1
YW29	1	1	1	1	1	4	3	1	1
YW31	1	1	1	1	1	4	3	1	1
YW32	1	1	1	1	1	4	3	1	1
YW34	3	1	1	4	1	4	1	1	1
YW35	1	1	1	1	1	4	3	1	1
YW36	1	1	1	1	1	4	3	1	1
YW37	3	1	1	4	1	4	1	1	1
YW38	3	1	1	4	1	4	1	1	1
YW40	1	1	1	1	1	4	3	1	1
YW41	3	1	1	4	1	4	1	1	1
YW42	3	1	1	4	1	4	1	1	1
YW43	1	1	1	1	1	4	3	1	1
YW44	3	1	1	4	1	4	1	1	1
YW49	3	1	1	4	1	4	1	1	1
YW50	1	1	1	1	1	4	3	1	1
YW51	3	1	1	4	1	4	1	1	1
YW53	1	1	1	1	1	4	3	1	1
YW54	3	1	1	4	1	4	1	1	1
YW55	1	1	1	1	1	4	3	1	1
YW56	3	1	1	4	1	4	1	1	1
YW57	3	1	1	4	1	4		1
YW58	3	1	1	4	1	4	1	1	1
YW59	3	1	1	4	1	4	1	1	1
YW64	3	1	1	4	1	4	1	1	1
YW70	3	1	1	4	1	4	1	1	1
YW71	3	1	1	4	1	4	1	1	1
YW72	3	1	1	4	1	4	1	1	1
YW74	3	1	1	4	1	4	1	1	1
YW75	3	1	1	4	1	4	1	1	1
YW76	3	1	1	4	1	4	1	1	1
YW77	3	1	1	4	1	4	1	1	1
YW79	3	1	1	4	1	4	1	1	1
YW80	3	1	1	4	1	4	1	1	1
YW82	3	1	1	4	1	4	1	1	1
YW83	3	1	1	4	1	4	1	1	1
YW84	3	1	1	4	1	4	1	1	1
YW85	3	1	1	4	1	4	1	1	1
YW86	3	1	1	4	1	4	1	1	1
YW87	3	1	1	4	1	4	1	1	1
YW88	3	1	1	4	1	4	1	1	1
YW90	3	1	1	4	1	4	1	1	1
YW91	3	1	1	4	1	4	1	1	1

## Sheet: Table S8
Table S8 Highly divergent variations and genes in Bordetella pertussis isolates
Variation_position (s)	Gene_id	Locus	start	end	dir	{nr}	{SwissProt}	{KEGG}	{COG}	{TCDB}	{GO}	{PHI}	{VFDB}	{ARDB}	{CARD}	{Secretory_Protein}	{T3SS}	{CAZy}	{Pfam}
52556	pb7_GM000045	Chr1	52318	53220	+	{ALX19853.1; integrase [Bordetella pertussis]}	{NA}	{bpe:BP1177; }	{WP.085748926.1; COG2801 Transposase InsO and inactivated derivatives X Mobilome: prophages, transposons;}	{NA}	{GO:0016987; sigma factor activity; molecular_function GO:0043565; sequence-specific DNA binding; molecular_function GO:0006355; regulation of transcription, DNA-dependent; biological_process GO:0015074; DNA integration; biological_process GO:0006352; transcription initiation, DNA-dependent; biological_process GO:0003677; DNA binding; molecular_function GO:0003700; sequence-specific DNA binding t…	{NA}	{NA}	{NA}	{NA}	{NA}	{false}	{AGW42619.1_; GH3 beta-glucosidase (EC 3.2.1.21); xylan 1,4-beta-xylosidase (EC 3.2.1.37); beta-glucosylceramidase (EC 3.2.1.45); beta-N-acetylhexosaminidase (EC 3.2.1.52); alpha-L-arabinofuranosidase (EC 3.2.1.55); glucan 1,4-beta-glucosidase (EC 3.2.1.74); isoprimeverose-producing oligoxyloglucan hydrolase (EC 3.2.1.120); coniferin beta-glucosidase (EC 3.2.1.126); exo-1,3-1,4-glucanase (EC 3.2.…	{PF01371:Trp repressor protein PF04545:Sigma-70, region 4 PF08281:Sigma-70, region 4 PF13404:AsnC-type helix-turn-helix domain PF01325:Iron dependent repressor, N-terminal DNA binding domain PF00392:Bacterial regulatory proteins, gntR family PF00665:Integrase core domain PF00356:Bacterial regulatory proteins, lacI family PF09339:IclR helix-turn-helix domain PF01381:Helix-turn-helix}
173422	pb7_GM000171	Chr1	172369	173949	-	{ETA64840.1; branched-chain amino acid ABC transporter [Bordetella pertussis 2371640|Bordetella pertussis H939|Bordetella pertussis STO1-CHOC-0008|Bordetella pertussis STO1-CHOC-0019|Bordetella pertussis STO1-SEAT-0004|Bordetella pertussis CHLA-26|Bordetella pertussis|Bordetella pertussis CHLA-13|Bordetella pertussis STO1-CNMC-0004|Bordetella pertussis H918|Bordetella pertussis I176|Bordetella pe…	{P21630; High-affinity branched-chain amino acid transport ATP-binding protein BraG }	{bpe:BP3718; K01995 livG branched-chain amino acid transport system ATP-binding protein -- Environmental Information Processing; Membrane transport; ABC transporters [PATH:ko02010] Cellular Processes; Cellular community - prokaryotes; Quorum sensing [PATH:ko02024]}	{WP.124689496.1; COG1129 ABC-type sugar transport system, ATPase component G Carbohydrate transport and metabolism ;}	{gnl|TC-DB|Q8DQH7; 3.A.1.4.10 ABC transporter ATP-binding protein-branched chain amino acid transport OS=Streptococcus pneumoniae (strain ATCC BAA-255 / R6) GN=livF PE=3 SV=1}	{GO:0015979; photosynthesis; biological_process GO:0007059; chromosome segregation; biological_process GO:0015995; chlorophyll biosynthetic process; biological_process GO:0070526; threonylcarbamoyladenosine biosynthetic process; biological_process GO:0003924; GTPase activity; molecular_function GO:0016851; magnesium chelatase activity; molecular_function GO:0005525; GTP binding; molecular_functio…	{NA}	{NA}	{NA}	{NA}	{NA}	{false}	{NA}	{PF00448:SRP54-type protein, GTPase domain PF02367:Threonylcarbamoyl adenosine biosynthesis protein TsaE PF00004:ATPase family associated with various cellular activities (AAA) PF00005:ABC transporter PF01926:50S ribosome-binding GTPase PF04310:MukB N-terminal PF06414:Zeta toxin PF00350:Dynamin family PF00437:Type II/IV secretion system protein PF01078:Magnesium chelatase, subunit ChlI PF03193:Rs…
181294	pb7_GM000179	Chr1	180789	181691	+	{ALX19853.1; integrase [Bordetella pertussis]}	{NA}	{bpe:BP1177; }	{WP.085748926.1; COG2801 Transposase InsO and inactivated derivatives X Mobilome: prophages, transposons;}	{NA}	{GO:0004803; transposase activity; molecular_function GO:0006352; transcription initiation, DNA-dependent; biological_process GO:0015074; DNA integration; biological_process GO:0043565; sequence-specific DNA binding; molecular_function GO:0016987; sigma factor activity; molecular_function GO:0006355; regulation of transcription, DNA-dependent; biological_process GO:0003677; DNA binding; molecular…	{NA}	{NA}	{NA}	{NA}	{NA}	{false}	{AGW42619.1_; GH3 beta-glucosidase (EC 3.2.1.21); xylan 1,4-beta-xylosidase (EC 3.2.1.37); beta-glucosylceramidase (EC 3.2.1.45); beta-N-acetylhexosaminidase (EC 3.2.1.52); alpha-L-arabinofuranosidase (EC 3.2.1.55); glucan 1,4-beta-glucosidase (EC 3.2.1.74); isoprimeverose-producing oligoxyloglucan hydrolase (EC 3.2.1.120); coniferin beta-glucosidase (EC 3.2.1.126); exo-1,3-1,4-glucanase (EC 3.2.…	{PF01022:Bacterial regulatory protein, arsR family PF05225:helix-turn-helix, Psq domain PF01371:Trp repressor protein PF01325:Iron dependent repressor, N-terminal DNA binding domain PF04218:CENP-B N-terminal DNA-binding domain PF04545:Sigma-70, region 4 PF13404:AsnC-type helix-turn-helix domain PF08281:Sigma-70, region 4 PF00356:Bacterial regulatory proteins, lacI family PF01527:Transposase PF003…
259983,259984,259985	pb7_GM000263	Chr1	259933	260379	+	{CPL41631.1; IS1002 transposase [Bordetella pertussis]}	{NA}	{bpa:BPP1897; }	{WP.066970399.1; COG2801 Transposase InsO and inactivated derivatives X Mobilome: prophages, transposons;}	{NA}	{GO:0015074; DNA integration; biological_process}	{NA}	{NA}	{NA}	{NA}	{NA}	{false}	{NA}	{PF00665:Integrase core domain}
261415,261417,261419,261420	pb7_GM000264	Chr1	260526	261428	+	{WP_023997950.1; IS481 family transposase [Bordetella pertussis H921|Bordetella bronchiseptica MBORD681|Bordetella bronchiseptica MBORD698|Bordetella bronchiseptica MBORD849|Bordetella bronchiseptica MBORD782|Bordetella pertussis I176|Bordetella holmesii 1058|Bordetella holmesii 30539|Bordetella holmesii 41130|Bordetella pertussis H939|Bordetella pertussis]}	{NA}	{bpet:B1917_1003; }	{WP.085748926.1; COG2801 Transposase InsO and inactivated derivatives X Mobilome: prophages, transposons;}	{NA}	{GO:0003677; DNA binding; molecular_function GO:0004803; transposase activity; molecular_function GO:0006352; transcription initiation, DNA-dependent; biological_process GO:0015074; DNA integration; biological_process GO:0016987; sigma factor activity; molecular_function GO:0043565; sequence-specific DNA binding; molecular_function GO:0006355; regulation of transcription, DNA-dependent; biologica…	{NA}	{NA}	{NA}	{NA}	{NA}	{false}	{AGW42619.1_; GH3 beta-glucosidase (EC 3.2.1.21); xylan 1,4-beta-xylosidase (EC 3.2.1.37); beta-glucosylceramidase (EC 3.2.1.45); beta-N-acetylhexosaminidase (EC 3.2.1.52); alpha-L-arabinofuranosidase (EC 3.2.1.55); glucan 1,4-beta-glucosidase (EC 3.2.1.74); isoprimeverose-producing oligoxyloglucan hydrolase (EC 3.2.1.120); coniferin beta-glucosidase (EC 3.2.1.126); exo-1,3-1,4-glucanase (EC 3.2.…	{PF01022:Bacterial regulatory protein, arsR family PF05225:helix-turn-helix, Psq domain PF01371:Trp repressor protein PF01325:Iron dependent repressor, N-terminal DNA binding domain PF04218:CENP-B N-terminal DNA-binding domain PF04545:Sigma-70, region 4 PF08281:Sigma-70, region 4 PF13404:AsnC-type helix-turn-helix domain PF00356:Bacterial regulatory proteins, lacI family PF01527:Transposase PF003…
401734	pb7_GM000400	Chr1	401229	402131	+	{ALX19838.1; integrase [Bordetella pertussis]}	{NA}	{bpet:B1917_2565; }	{WP.085752050.1; COG2801 Transposase InsO and inactivated derivatives X Mobilome: prophages, transposons;}	{NA}	{GO:0004803; transposase activity; molecular_function GO:0015074; DNA integration; biological_process GO:0006352; transcription initiation, DNA-dependent; biological_process GO:0043565; sequence-specific DNA binding; molecular_function GO:0016987; sigma factor activity; molecular_function GO:0006355; regulation of transcription, DNA-dependent; biological_process GO:0003677; DNA binding; molecular…	{NA}	{NA}	{NA}	{NA}	{NA}	{false}	{AGW42619.1_; GH3 beta-glucosidase (EC 3.2.1.21); xylan 1,4-beta-xylosidase (EC 3.2.1.37); beta-glucosylceramidase (EC 3.2.1.45); beta-N-acetylhexosaminidase (EC 3.2.1.52); alpha-L-arabinofuranosidase (EC 3.2.1.55); glucan 1,4-beta-glucosidase (EC 3.2.1.74); isoprimeverose-producing oligoxyloglucan hydrolase (EC 3.2.1.120); coniferin beta-glucosidase (EC 3.2.1.126); exo-1,3-1,4-glucanase (EC 3.2.…	{PF00356:Bacterial regulatory proteins, lacI family PF01527:Transposase PF00392:Bacterial regulatory proteins, gntR family PF01381:Helix-turn-helix PF09339:IclR helix-turn-helix domain PF01022:Bacterial regulatory protein, arsR family PF05225:helix-turn-helix, Psq domain PF01371:Trp repressor protein PF01325:Iron dependent repressor, N-terminal DNA binding domain PF04218:CENP-B N-terminal DNA-bin…
508002	pb7_GM000515	Chr1	507497	508399	+	{WP_023997950.1; IS481 family transposase [Bordetella pertussis H921|Bordetella bronchiseptica MBORD681|Bordetella bronchiseptica MBORD698|Bordetella bronchiseptica MBORD849|Bordetella bronchiseptica MBORD782|Bordetella pertussis I176|Bordetella holmesii 1058|Bordetella holmesii 30539|Bordetella holmesii 41130|Bordetella pertussis H939|Bordetella pertussis]}	{NA}	{bpet:B1917_1003; }	{WP.085748926.1; COG2801 Transposase InsO and inactivated derivatives X Mobilome: prophages, transposons;}	{NA}	{GO:0006313; transposition, DNA-mediated; biological_process GO:0003700; sequence-specific DNA binding transcription factor activity; molecular_function GO:0005622; intracellular; cellular_component GO:0043565; sequence-specific DNA binding; molecular_function GO:0006355; regulation of transcription, DNA-dependent; biological_process GO:0016987; sigma factor activity; molecular_function GO:000480…	{NA}	{NA}	{NA}	{NA}	{NA}	{false}	{AGW42619.1_; GH3 beta-glucosidase (EC 3.2.1.21); xylan 1,4-beta-xylosidase (EC 3.2.1.37); beta-glucosylceramidase (EC 3.2.1.45); beta-N-acetylhexosaminidase (EC 3.2.1.52); alpha-L-arabinofuranosidase (EC 3.2.1.55); glucan 1,4-beta-glucosidase (EC 3.2.1.74); isoprimeverose-producing oligoxyloglucan hydrolase (EC 3.2.1.120); coniferin beta-glucosidase (EC 3.2.1.126); exo-1,3-1,4-glucanase (EC 3.2.…	{PF00325:Bacterial regulatory proteins, crp family PF00376:MerR family regulatory protein PF00665:Integrase core domain PF01498:Transposase PF01047:MarR family PF01371:Trp repressor protein PF01022:Bacterial regulatory protein, arsR family PF05225:helix-turn-helix, Psq domain PF04545:Sigma-70, region 4 PF13404:AsnC-type helix-turn-helix domain PF08281:Sigma-70, region 4 PF01325:Iron dependent rep…
518263	pb7_GM000525	Chr1	517474	521136	+	{WP_023995109.1; translocation/assembly module TamB domain-containing protein [Bordetella pertussis|Bordetella pertussis CHLA-20|Bordetella pertussis CHLA-15|Bordetella pertussis 2356847]}	{NA}	{bpet:B1917_0188; K09800 tamB translocation and assembly module TamB -- }	{WP.013396244.1; COG2911 Autotransporter translocation and assembly protein TamB U Intracellular trafficking, secretion, and vesicular transport ;}	{NA}	{NA}	{NA}	{NA}	{NA}	{NA}	{NA}	{false}	{NA}	{NA}
598981,598982,598983	pb7_GM000601	Chr1	598751	599656	+	{WP_023997950.1; IS481 family transposase [Bordetella pertussis H921|Bordetella bronchiseptica MBORD681|Bordetella bronchiseptica MBORD698|Bordetella bronchiseptica MBORD849|Bordetella bronchiseptica MBORD782|Bordetella pertussis I176|Bordetella holmesii 1058|Bordetella holmesii 30539|Bordetella holmesii 41130|Bordetella pertussis H939|Bordetella pertussis]}	{NA}	{bpet:B1917_1003; }	{WP.085748926.1; COG2801 Transposase InsO and inactivated derivatives X Mobilome: prophages, transposons;}	{NA}	{GO:0003677; DNA binding; molecular_function GO:0043565; sequence-specific DNA binding; molecular_function GO:0016987; sigma factor activity; molecular_function GO:0006355; regulation of transcription, DNA-dependent; biological_process GO:0015074; DNA integration; biological_process GO:0004803; transposase activity; molecular_function GO:0006352; transcription initiation, DNA-dependent; biologica…	{NA}	{NA}	{NA}	{NA}	{NA}	{false}	{AGW42619.1_; GH3 beta-glucosidase (EC 3.2.1.21); xylan 1,4-beta-xylosidase (EC 3.2.1.37); beta-glucosylceramidase (EC 3.2.1.45); beta-N-acetylhexosaminidase (EC 3.2.1.52); alpha-L-arabinofuranosidase (EC 3.2.1.55); glucan 1,4-beta-glucosidase (EC 3.2.1.74); isoprimeverose-producing oligoxyloglucan hydrolase (EC 3.2.1.120); coniferin beta-glucosidase (EC 3.2.1.126); exo-1,3-1,4-glucanase (EC 3.2.…	{PF01325:Iron dependent repressor, N-terminal DNA binding domain PF04545:Sigma-70, region 4 PF13404:AsnC-type helix-turn-helix domain PF08281:Sigma-70, region 4 PF01371:Trp repressor protein PF01381:Helix-turn-helix PF00126:Bacterial regulatory helix-turn-helix protein, lysR family PF00665:Integrase core domain PF00356:Bacterial regulatory proteins, lacI family PF01498:Transposase PF00376:MerR fa…
619477	pb7_GM000626	Chr1	619429	620007	-	{SUV88880.1; transposase [Bordetella pertussis]}	{NA}	{bhm:D558_0873; }	{WP.049098620.1; COG2963 Transposase InsE and inactivated derivatives X Mobilome: prophages, transposons;}	{NA}	{GO:0000150; recombinase activity; molecular_function GO:0006310; DNA recombination; biological_process GO:0043565; sequence-specific DNA binding; molecular_function GO:0006355; regulation of transcription, DNA-dependent; biological_process GO:0016987; sigma factor activity; molecular_function GO:0004803; transposase activity; molecular_function GO:0006352; transcription initiation, DNA-dependent…	{NA}	{NA}	{NA}	{NA}	{NA}	{false}	{NA}	{PF04218:CENP-B N-terminal DNA-binding domain PF01325:Iron dependent repressor, N-terminal DNA binding domain PF09048:Cro PF13404:AsnC-type helix-turn-helix domain PF08281:Sigma-70, region 4 PF04545:Sigma-70, region 4 PF05225:helix-turn-helix, Psq domain PF01022:Bacterial regulatory protein, arsR family PF01371:Trp repressor protein PF02796:Helix-turn-helix domain of resolvase PF01381:Helix-turn-…
688718	pb7_GM000700	Chr1	688049	688951	-	{ALX20119.1; integrase [Bordetella pertussis]}	{NA}	{bpc:BPTD_0710; }	{WP.085748926.1; COG2801 Transposase InsO and inactivated derivatives X Mobilome: prophages, transposons;}	{NA}	{GO:0004803; transposase activity; molecular_function GO:0015074; DNA integration; biological_process GO:0006352; transcription initiation, DNA-dependent; biological_process GO:0016987; sigma factor activity; molecular_function GO:0043565; sequence-specific DNA binding; molecular_function GO:0006355; regulation of transcription, DNA-dependent; biological_process GO:0003677; DNA binding; molecular…	{NA}	{NA}	{NA}	{NA}	{NA}	{false}	{AGW42619.1_; GH3 beta-glucosidase (EC 3.2.1.21); xylan 1,4-beta-xylosidase (EC 3.2.1.37); beta-glucosylceramidase (EC 3.2.1.45); beta-N-acetylhexosaminidase (EC 3.2.1.52); alpha-L-arabinofuranosidase (EC 3.2.1.55); glucan 1,4-beta-glucosidase (EC 3.2.1.74); isoprimeverose-producing oligoxyloglucan hydrolase (EC 3.2.1.120); coniferin beta-glucosidase (EC 3.2.1.126); exo-1,3-1,4-glucanase (EC 3.2.…	{PF04545:Sigma-70, region 4 PF08281:Sigma-70, region 4 PF13404:AsnC-type helix-turn-helix domain PF01325:Iron dependent repressor, N-terminal DNA binding domain PF01371:Trp repressor protein PF00325:Bacterial regulatory proteins, crp family PF09339:IclR helix-turn-helix domain PF01381:Helix-turn-helix PF01047:MarR family PF01527:Transposase PF00376:MerR family regulatory protein PF00392:Bacterial…
783316	pb7_GM000794	Chr1	782644	783546	-	{ALX19831.1; integrase [Bordetella pertussis|Bordetella pertussis STO1-CHOM-0012]}	{NA}	{bpeu:Q425_15130; }	{WP.085748926.1; COG2801 Transposase InsO and inactivated derivatives X Mobilome: prophages, transposons;}	{NA}	{GO:0005622; intracellular; cellular_component GO:0006313; transposition, DNA-mediated; biological_process GO:0003700; sequence-specific DNA binding transcription factor activity; molecular_function GO:0003677; DNA binding; molecular_function GO:0004803; transposase activity; molecular_function GO:0006352; transcription initiation, DNA-dependent; biological_process GO:0015074; DNA integration; bi…	{NA}	{NA}	{NA}	{NA}	{NA}	{false}	{AGW42619.1_; GH3 beta-glucosidase (EC 3.2.1.21); xylan 1,4-beta-xylosidase (EC 3.2.1.37); beta-glucosylceramidase (EC 3.2.1.45); beta-N-acetylhexosaminidase (EC 3.2.1.52); alpha-L-arabinofuranosidase (EC 3.2.1.55); glucan 1,4-beta-glucosidase (EC 3.2.1.74); isoprimeverose-producing oligoxyloglucan hydrolase (EC 3.2.1.120); coniferin beta-glucosidase (EC 3.2.1.126); exo-1,3-1,4-glucanase (EC 3.2.…	{PF01381:Helix-turn-helix PF09339:IclR helix-turn-helix domain PF00356:Bacterial regulatory proteins, lacI family PF00392:Bacterial regulatory proteins, gntR family PF01527:Transposase PF04218:CENP-B N-terminal DNA-binding domain PF01325:Iron dependent repressor, N-terminal DNA binding domain PF13404:AsnC-type helix-turn-helix domain PF08281:Sigma-70, region 4 PF04545:Sigma-70, region 4 PF05225:h…
985257	pb7_GM000990	Chr1	985228	985800	+	{ETH90224.1; transposase, IS481 family, partial [Bordetella pertussis STO1-CHOC-0019|Bordetella pertussis]}	{NA}	{bpeu:Q425_6810; }	{WP.096367656.1; COG2801 Transposase InsO and inactivated derivatives X Mobilome: prophages, transposons;}	{NA}	{GO:0015074; DNA integration; biological_process}	{NA}	{NA}	{NA}	{NA}	{NA}	{false}	{NA}	{PF00665:Integrase core domain}
1059309	pb7_GM001077	Chr1	1058826	1060268	-	{AEE68486.1; pyruvate kinase [Bordetella pertussis 18323|Bordetella pertussis B1917|Bordetella pertussis Tohama I|Bordetella pertussis CS|Bordetella pertussis|Bordetella pertussis B1920|Bordetella pertussis 137]}	{P21599; Pyruvate kinase II }	{bpeu:Q425_32960; K00873 PK, pyk pyruvate kinase 2.7.1.40 Metabolism; Carbohydrate metabolism; Glycolysis / Gluconeogenesis [PATH:ko00010] Metabolism; Nucleotide metabolism; Purine metabolism [PATH:ko00230] Metabolism; Carbohydrate metabolism; Pyruvate metabolism [PATH:ko00620] Metabolism; Global and overview maps; Metabolic pathways [PATH:ko01100] Metabolism; Global and overview maps; Biosynthes…	{WP.013391608.1; COG0469 Pyruvate kinase G Carbohydrate transport and metabolism ;}	{NA}	{GO:0004743; pyruvate kinase activity; molecular_function GO:0000287; magnesium ion binding; molecular_function GO:0006096; glycolysis; biological_process GO:0030955; potassium ion binding; molecular_function}	{PHI:6684__PHI:9762; NA}	{NA}	{NA}	{NA}	{NA}	{false}	{NA}	{PF00224:Pyruvate kinase, barrel domain}
1155730,1156217	pb7_GM001160	Chr1	1155729	1156469	-	{AQC39294.1; IS481 family transposase [Bordetella pertussis]}	{NA}	{bho:D560_2034; }	{WP.049098620.1; COG2963 Transposase InsE and inactivated derivatives X Mobilome: prophages, transposons;}	{NA}	{GO:0003677; DNA binding; molecular_function GO:0006355; regulation of transcription, DNA-dependent; biological_process GO:0043565; sequence-specific DNA binding; molecular_function GO:0016987; sigma factor activity; molecular_function GO:0006352; transcription initiation, DNA-dependent; biological_process GO:0004803; transposase activity; molecular_function GO:0015074; DNA integration; biologica…	{NA}	{NA}	{NA}	{NA}	{NA}	{false}	{AGW42619.1_; GH3 beta-glucosidase (EC 3.2.1.21); xylan 1,4-beta-xylosidase (EC 3.2.1.37); beta-glucosylceramidase (EC 3.2.1.45); beta-N-acetylhexosaminidase (EC 3.2.1.52); alpha-L-arabinofuranosidase (EC 3.2.1.55); glucan 1,4-beta-glucosidase (EC 3.2.1.74); isoprimeverose-producing oligoxyloglucan hydrolase (EC 3.2.1.120); coniferin beta-glucosidase (EC 3.2.1.126); exo-1,3-1,4-glucanase (EC 3.2.…	{PF01498:Transposase PF00356:Bacterial regulatory proteins, lacI family PF00665:Integrase core domain PF01047:MarR family PF01381:Helix-turn-helix PF09339:IclR helix-turn-helix domain PF01371:Trp repressor protein PF00325:Bacterial regulatory proteins, crp family PF01325:Iron dependent repressor, N-terminal DNA binding domain PF13404:AsnC-type helix-turn-helix domain PF08281:Sigma-70, region 4 PF…
1203512	pb7_GM001203	Chr1	1203271	1204734	+	{WP_014905535.1; efflux transporter outer membrane subunit [Bordetella pertussis|Bordetella pertussis 18323]}	{NA}	{bper:BN118_0728; K18308 opmD outer membrane protein, multidrug efflux system -- }	{WP.013392126.1; COG1538 Outer membrane protein TolC M Cell wall/membrane/envelope biogenesis ;}	{gnl|TC-DB|Q9HWH3; 2.A.6.2.32 Probable outer membrane protein OS=Pseudomonas aeruginosa GN=opmD PE=4 SV=1}	{GO:0006810; transport; biological_process GO:0005215; NA}	{NA}	{NA}	{NA}	{NA}	{YES}	{false}	{NA}	{PF02321:Outer membrane efflux protein}
1238149	pb7_GM001232	Chr1	1238145	1238573	+	{RAY51231.1; IS481-like element IS481 family transposase, partial [Enterobacter hormaechei subsp. xiangfangensis]}	{NA}	{bpeu:Q425_29440; }	{WP.083438028.1; COG2801 Transposase InsO and inactivated derivatives X Mobilome: prophages, transposons;}	{NA}	{GO:0015074; DNA integration; biological_process}	{NA}	{NA}	{NA}	{NA}	{NA}	{false}	{NA}	{PF00665:Integrase core domain}
1333132	pb7_GM001326	Chr1	1333089	1333322	+	{AUL10657.1; hypothetical protein BOB51_05115 [Bordetella pertussis]}	{NA}	{NA}	{NA}	{NA}	{NA}	{NA}	{NA}	{NA}	{NA}	{NA}	{false}	{NA}	{NA}
1344872	pb7_GM001335	Chr1	1343644	1344987	+	{ETH06081.1; outer membrane efflux protein OprM [Bordetella pertussis STO1-CNMC-0004|Bordetella pertussis H918|Bordetella pertussis H934|Bordetella pertussis H897|Bordetella pertussis H921|Bordetella pertussis 2356847]}	{Q9KJC1; Antibiotic efflux pump outer membrane protein ArpC }	{bpc:BPTD_0981; K18139 oprM, emhC, ttgC, cusC, adeK, smeF, mtrE, cmeC, gesC outer membrane protein, multidrug efflux system -- Human Diseases; Drug resistance: Antimicrobial; beta-Lactam resistance [PATH:ko01501] Cellular Processes; Cellular community - prokaryotes; Quorum sensing [PATH:ko02024]}	{WP.012249931.1; COG1538 Outer membrane protein TolC M Cell wall/membrane/envelope biogenesis ;}	{gnl|TC-DB|Q8ZRH0; 2.A.6.2.25 Homology to outer membrane efflux protein - Salmonella typhimurium.}	{GO:0005215; NA GO:0006810; transport; biological_process}	{PHI:6388; Q24LT6 adeK 470 Acinetobacter baumannii Pneumonia; Bloodstream infections Mus musculus (related: house mouse) Multidrug efflux protein Gene mutation unaffected pathogenicity}	{VFG037010; VF0451 MtrCDE mtrE multidrug efflux pump channel protein MtrE Resistance/nodulation/division (RND)-type efflux pump; regulated by two transcriptional regulators: a repressor MtrR and an activator MtrA - "A tripartite multidrug efflux pump essential for resistance to <beta>-lactams (penicillin G and nafcillin), macrolides (erythromycin), and host-derived compounds (peptide LL-37 and pr…	{NA}	{NA}	{NA}	{false}	{NA}	{PF02321:Outer membrane efflux protein}
1426242,1426244,1426249,1426250,1426253,1426254	pb7_GM001414	Chr1	1426162	1428450	+	{WP_055327570.1; NADP-dependent malic enzyme [Bordetella pertussis]}	{P76558; NADP-dependent malic enzyme }	{bpc:BPTD_1057; K00029 E1.1.1.40, maeB malate dehydrogenase (oxaloacetate-decarboxylating)(NADP+) 1.1.1.40 Metabolism; Carbohydrate metabolism; Pyruvate metabolism [PATH:ko00620] Metabolism; Energy metabolism; Carbon fixation in photosynthetic organisms [PATH:ko00710] Metabolism; Global and overview maps; Metabolic pathways [PATH:ko01100] Metabolism; Global and overview maps; Microbial metabolism…	{WP.013395731.1; COG0281 Malic enzyme C Energy production and conversion ;}	{NA}	{GO:0016746; transferase activity, transferring acyl groups; molecular_function GO:0055114; oxidation-reduction process; biological_process GO:0004471; malate dehydrogenase (decarboxylating) activity; molecular_function GO:0051287; NAD binding; molecular_function GO:0008152; NA}	{NA}	{NA}	{NA}	{NA}	{NA}	{false}	{NA}	{PF00390:Malic enzyme, N-terminal domain PF01515:Phosphate acetyl/butaryl transferase PF03949:Malic enzyme, NAD binding domain}
1460272	pb7_GM001445	Chr1	1459767	1460669	+	{WP_023997950.1; IS481 family transposase [Bordetella pertussis H921|Bordetella bronchiseptica MBORD681|Bordetella bronchiseptica MBORD698|Bordetella bronchiseptica MBORD849|Bordetella bronchiseptica MBORD782|Bordetella pertussis I176|Bordetella holmesii 1058|Bordetella holmesii 30539|Bordetella holmesii 41130|Bordetella pertussis H939|Bordetella pertussis]}	{NA}	{bpet:B1917_1003; }	{WP.085748926.1; COG2801 Transposase InsO and inactivated derivatives X Mobilome: prophages, transposons;}	{NA}	{GO:0005622; intracellular; cellular_component GO:0003700; sequence-specific DNA binding transcription factor activity; molecular_function GO:0006313; transposition, DNA-mediated; biological_process GO:0003677; DNA binding; molecular_function GO:0015074; DNA integration; biological_process GO:0004803; transposase activity; molecular_function GO:0006352; transcription initiation, DNA-dependent; bi…	{NA}	{NA}	{NA}	{NA}	{NA}	{false}	{AGW42619.1_; GH3 beta-glucosidase (EC 3.2.1.21); xylan 1,4-beta-xylosidase (EC 3.2.1.37); beta-glucosylceramidase (EC 3.2.1.45); beta-N-acetylhexosaminidase (EC 3.2.1.52); alpha-L-arabinofuranosidase (EC 3.2.1.55); glucan 1,4-beta-glucosidase (EC 3.2.1.74); isoprimeverose-producing oligoxyloglucan hydrolase (EC 3.2.1.120); coniferin beta-glucosidase (EC 3.2.1.126); exo-1,3-1,4-glucanase (EC 3.2.…	{PF01498:Transposase PF00665:Integrase core domain PF00376:MerR family regulatory protein PF01047:MarR family PF00325:Bacterial regulatory proteins, crp family PF00356:Bacterial regulatory proteins, lacI family PF00392:Bacterial regulatory proteins, gntR family PF01527:Transposase PF01381:Helix-turn-helix PF09339:IclR helix-turn-helix domain PF05225:helix-turn-helix, Psq domain PF01022:Bacterial …
1487565,1487566,1487567,1487568,1487569,1487571,1487572	pb7_GM001467	Chr1	1487421	1487618	-	{AQD15777.1; hypothetical protein ADU67_12035 [Bordetella pertussis]}	{NA}	{NA}	{NA}	{NA}	{NA}	{NA}	{NA}	{NA}	{NA}	{NA}	{false}	{NA}	{NA}
1487948	pb7_GM001468	Chr1	1487632	1489191	+	{AZW92450.1; hypothetical protein CG028_05645 [Bordetella pertussis]}	{NA}	{bper:BN118_0302; }	{WP.085748926.1; COG2801 Transposase InsO and inactivated derivatives X Mobilome: prophages, transposons;}	{NA}	{GO:0003677; DNA binding; molecular_function GO:0016987; sigma factor activity; molecular_function GO:0043565; sequence-specific DNA binding; molecular_function GO:0006355; regulation of transcription, DNA-dependent; biological_process GO:0015074; DNA integration; biological_process GO:0006352; transcription initiation, DNA-dependent; biological_process GO:0016787; hydrolase activity; molecular_f…	{NA}	{NA}	{NA}	{NA}	{NA}	{false}	{AGW42619.1_; GH3 beta-glucosidase (EC 3.2.1.21); xylan 1,4-beta-xylosidase (EC 3.2.1.37); beta-glucosylceramidase (EC 3.2.1.45); beta-N-acetylhexosaminidase (EC 3.2.1.52); alpha-L-arabinofuranosidase (EC 3.2.1.55); glucan 1,4-beta-glucosidase (EC 3.2.1.74); isoprimeverose-producing oligoxyloglucan hydrolase (EC 3.2.1.120); coniferin beta-glucosidase (EC 3.2.1.126); exo-1,3-1,4-glucanase (EC 3.2.…	{PF01371:Trp repressor protein PF00325:Bacterial regulatory proteins, crp family PF01325:Iron dependent repressor, N-terminal DNA binding domain PF08281:Sigma-70, region 4 PF13404:AsnC-type helix-turn-helix domain PF04545:Sigma-70, region 4 PF00356:Bacterial regulatory proteins, lacI family PF00665:Integrase core domain PF00753:Metallo-beta-lactamase superfamily PF01047:MarR family PF01381:Helix-…
1489562	pb7_GM001469	Chr1	1489290	1490159	+	{CPQ40197.1; hydrolase [Bordetella pertussis]}	{NA}	{bpe:BP1115; }	{WP.012249668.1; COG0596 2-succinyl-6-hydroxy-2,4-cyclohexadiene-1-carboxylate synthase MenH and related esterases, alpha/beta hydrolase fold HR Coenzyme transport and metabolism ; General function prediction only ;}	{NA}	{GO:0009058; biosynthetic process; biological_process GO:0016788; hydrolase activity, acting on ester bonds; molecular_function}	{NA}	{NA}	{NA}	{NA}	{NA}	{false}	{NA}	{PF00975:Thioesterase domain}
1514014	pb7_GM001489	Chr1	1514008	1514664	+	{AUK97772.1; hypothetical protein BOB47_14065 [Bordetella pertussis]}	{NA}	{bpeu:Q425_30010; }	{WP.085748926.1; COG2801 Transposase InsO and inactivated derivatives X Mobilome: prophages, transposons;}	{NA}	{GO:0006352; transcription initiation, DNA-dependent; biological_process GO:0015074; DNA integration; biological_process GO:0043565; sequence-specific DNA binding; molecular_function GO:0016987; sigma factor activity; molecular_function GO:0006355; regulation of transcription, DNA-dependent; biological_process GO:0003677; DNA binding; molecular_function GO:0003700; sequence-specific DNA binding t…	{NA}	{NA}	{NA}	{NA}	{NA}	{false}	{NA}	{PF01325:Iron dependent repressor, N-terminal DNA binding domain PF09048:Cro PF13404:AsnC-type helix-turn-helix domain PF08281:Sigma-70, region 4 PF04545:Sigma-70, region 4 PF01371:Trp repressor protein PF00325:Bacterial regulatory proteins, crp family PF01047:MarR family PF01381:Helix-turn-helix PF09339:IclR helix-turn-helix domain PF00356:Bacterial regulatory proteins, lacI family PF00665:Integ…
1552591,1552852	pb7_GM001527	Chr1	1552548	1552988	+	{ETH91626.1; transposase, IS481 family [Bordetella pertussis STO1-CHOC-0019]}	{NA}	{bpet:B1917_2677; }	{WP.083438028.1; COG2801 Transposase InsO and inactivated derivatives X Mobilome: prophages, transposons;}	{NA}	{GO:0015074; DNA integration; biological_process}	{NA}	{NA}	{NA}	{NA}	{NA}	{false}	{NA}	{PF00665:Integrase core domain}
1598108	pb7_GM001576	Chr1	1597603	1598505	+	{ALX19986.1; integrase [Bordetella pertussis]}	{NA}	{bpeu:Q425_30010; }	{WP.085748926.1; COG2801 Transposase InsO and inactivated derivatives X Mobilome: prophages, transposons;}	{NA}	{GO:0003677; DNA binding; molecular_function GO:0043565; sequence-specific DNA binding; molecular_function GO:0016987; sigma factor activity; molecular_function GO:0006355; regulation of transcription, DNA-dependent; biological_process GO:0006352; transcription initiation, DNA-dependent; biological_process GO:0004803; transposase activity; molecular_function GO:0015074; DNA integration; biologica…	{NA}	{NA}	{NA}	{NA}	{NA}	{false}	{AGW42619.1_; GH3 beta-glucosidase (EC 3.2.1.21); xylan 1,4-beta-xylosidase (EC 3.2.1.37); beta-glucosylceramidase (EC 3.2.1.45); beta-N-acetylhexosaminidase (EC 3.2.1.52); alpha-L-arabinofuranosidase (EC 3.2.1.55); glucan 1,4-beta-glucosidase (EC 3.2.1.74); isoprimeverose-producing oligoxyloglucan hydrolase (EC 3.2.1.120); coniferin beta-glucosidase (EC 3.2.1.126); exo-1,3-1,4-glucanase (EC 3.2.…	{PF01381:Helix-turn-helix PF09339:IclR helix-turn-helix domain PF00356:Bacterial regulatory proteins, lacI family PF00392:Bacterial regulatory proteins, gntR family PF01527:Transposase PF04218:CENP-B N-terminal DNA-binding domain PF01325:Iron dependent repressor, N-terminal DNA binding domain PF08281:Sigma-70, region 4 PF13404:AsnC-type helix-turn-helix domain PF04545:Sigma-70, region 4 PF05225:h…
1687913	pb7_GM001661	Chr1	1687895	1688191	+	{ANT92541.1; hypothetical protein BBB38_05425 [Bordetella pertussis]}	{NA}	{bbro:BAU06_06220; }	{NA}	{NA}	{NA}	{NA}	{NA}	{NA}	{NA}	{NA}	{false}	{NA}	{NA}
1717899	pb7_GM001689	Chr1	1717698	1717910	+	{ETH46343.1; transposase, IS481 family, partial [Bordetella pertussis H921]}	{NA}	{NA}	{NA}	{NA}	{GO:0006355; regulation of transcription, DNA-dependent; biological_process GO:0004803; transposase activity; molecular_function GO:0003677; DNA binding; molecular_function GO:0006313; transposition, DNA-mediated; biological_process}	{NA}	{NA}	{NA}	{NA}	{NA}	{false}	{NA}	{PF00376:MerR family regulatory protein PF01527:Transposase PF13411:MerR HTH family regulatory protein}
1837739,1837764	pb7_GM001808	Chr1	1837735	1838637	-	{ALX21880.1; integrase [Bordetella pertussis]}	{NA}	{bpet:B1917_2406; }	{WP.085748926.1; COG2801 Transposase InsO and inactivated derivatives X Mobilome: prophages, transposons;}	{NA}	{GO:0043565; sequence-specific DNA binding; molecular_function GO:0006355; regulation of transcription, DNA-dependent; biological_process GO:0016987; sigma factor activity; molecular_function GO:0015074; DNA integration; biological_process GO:0004803; transposase activity; molecular_function GO:0006352; transcription initiation, DNA-dependent; biological_process GO:0003677; DNA binding; molecular…	{NA}	{NA}	{NA}	{NA}	{NA}	{false}	{AGW42619.1_; GH3 beta-glucosidase (EC 3.2.1.21); xylan 1,4-beta-xylosidase (EC 3.2.1.37); beta-glucosylceramidase (EC 3.2.1.45); beta-N-acetylhexosaminidase (EC 3.2.1.52); alpha-L-arabinofuranosidase (EC 3.2.1.55); glucan 1,4-beta-glucosidase (EC 3.2.1.74); isoprimeverose-producing oligoxyloglucan hydrolase (EC 3.2.1.120); coniferin beta-glucosidase (EC 3.2.1.126); exo-1,3-1,4-glucanase (EC 3.2.…	{PF00325:Bacterial regulatory proteins, crp family PF01047:MarR family PF00376:MerR family regulatory protein PF01498:Transposase PF00665:Integrase core domain PF08281:Sigma-70, region 4 PF13404:AsnC-type helix-turn-helix domain PF04545:Sigma-70, region 4 PF04218:CENP-B N-terminal DNA-binding domain PF01325:Iron dependent repressor, N-terminal DNA binding domain PF01371:Trp repressor protein PF05…
1880738	pb7_GM001848	Chr1	1880350	1880742	+	{WP_023997683.1; TRAP transporter small permease subunit, partial [Bordetella pertussis|Bordetella pertussis CHLA-13]}	{NA}	{bpc:BPTD_1471; }	{WP.013393120.1; COG4665 TRAP-type mannitol/chloroaromatic compound transport system, small permease component Q Secondary metabolites biosynthesis, transport and catabolism ;}	{gnl|TC-DB|D5ATK0; 2.A.56.3.4 Tripartite ATP-independent periplasmic transporter, DctQ-2 component OS=Rhodobacter capsulatus (strain ATCC BAA-309 / NBRC 16581 / SB1003) GN=dctQ2 PE=4 SV=1}	{NA}	{NA}	{NA}	{NA}	{NA}	{NA}	{false}	{NA}	{NA}
1885735,1885736,1885737,1886211,1886212,1886213	pb7_GM001855	Chr1	1885489	1886736	+	{WP_003814009.1; MULTISPECIES: MFS transporter [Bordetella holmesii ATCC 51541|Bordetella pertussis STO1-CHOC-0019|Bordetella pertussis H939|Mycobacteroides abscessus subsp. abscessus|Bordetella pertussis H934|Bordetella pertussis STO1-CHOC-0018|Bordetella pertussis STO1-CHOC-0017|Bordetella pertussis H918|Bordetella holmesii CDC-H785-BH|Bordetella pertussis B200|Bordetella|Bordetella holmesii 35…	{NA}	{bbh:BN112_4526; }	{WP.012248525.1; COG2814 Predicted arabinose efflux permease AraJ, MFS family G Carbohydrate transport and metabolism ;}	{NA}	{GO:0016021; integral to membrane; cellular_component GO:0055085; transmembrane transport; biological_process}	{NA}	{NA}	{NA}	{NA}	{NA}	{false}	{NA}	{PF07690:Major Facilitator Superfamily}
2138534	pb7_GM002105	Chr1	2137250	2138959	-	{WP_010930603.1; thiamine pyrophosphate-binding protein [Bordetella pertussis STO1-CHOC-0019|Bordetella pertussis H939|Bordetella pertussis H918|Bordetella pertussis|Bordetella pertussis STO1-CHLA-0011|Bordetella pertussis STO1-CHOM-0012|Bordetella pertussis STO1-CHOC-0017|Bordetella pertussis H921|Bordetella pertussis B200|Bordetella pertussis H934]}	{NA}	{bpc:BPTD_1836; K01652 E2.2.1.6L, ilvB, ilvG, ilvI acetolactate synthase I/II/III large subunit 2.2.1.6 Metabolism; Amino acid metabolism; Valine, leucine and isoleucine biosynthesis [PATH:ko00290] Metabolism; Carbohydrate metabolism; Butanoate metabolism [PATH:ko00650] Metabolism; Carbohydrate metabolism; C5-Branched dibasic acid metabolism [PATH:ko00660] Metabolism; Metabolism of cofactors and …	{WP.013393727.1; COG0028 Acetolactate synthase large subunit or other thiamine pyrophosphate-requiring enzyme EH Amino acid transport and metabolism ; Coenzyme transport and metabolism ;}	{NA}	{GO:0000287; magnesium ion binding; molecular_function GO:0030976; thiamine pyrophosphate binding; molecular_function GO:0003824; NA}	{NA}	{NA}	{NA}	{NA}	{NA}	{false}	{NA}	{PF00205:Thiamine pyrophosphate enzyme, central domain PF02776:Thiamine pyrophosphate enzyme, N-terminal TPP binding domain PF02775:Thiamine pyrophosphate enzyme, C-terminal TPP binding domain}
2332472,2332640,2332744	pb7_GM002278	Chr1	2332239	2333141	+	{ALX21503.1; integrase [Bordetella pertussis]}	{NA}	{bpet:B1917_1827; }	{WP.085748926.1; COG2801 Transposase InsO and inactivated derivatives X Mobilome: prophages, transposons;}	{NA}	{GO:0003700; sequence-specific DNA binding transcription factor activity; molecular_function GO:0006313; transposition, DNA-mediated; biological_process GO:0005622; intracellular; cellular_component GO:0043565; sequence-specific DNA binding; molecular_function GO:0016987; sigma factor activity; molecular_function GO:0006355; regulation of transcription, DNA-dependent; biological_process GO:000480…	{NA}	{NA}	{NA}	{NA}	{NA}	{false}	{AGW42619.1_; GH3 beta-glucosidase (EC 3.2.1.21); xylan 1,4-beta-xylosidase (EC 3.2.1.37); beta-glucosylceramidase (EC 3.2.1.45); beta-N-acetylhexosaminidase (EC 3.2.1.52); alpha-L-arabinofuranosidase (EC 3.2.1.55); glucan 1,4-beta-glucosidase (EC 3.2.1.74); isoprimeverose-producing oligoxyloglucan hydrolase (EC 3.2.1.120); coniferin beta-glucosidase (EC 3.2.1.126); exo-1,3-1,4-glucanase (EC 3.2.…	{PF01325:Iron dependent repressor, N-terminal DNA binding domain PF04545:Sigma-70, region 4 PF13404:AsnC-type helix-turn-helix domain PF08281:Sigma-70, region 4 PF01371:Trp repressor protein PF00325:Bacterial regulatory proteins, crp family PF01381:Helix-turn-helix PF01047:MarR family PF09339:IclR helix-turn-helix domain PF00665:Integrase core domain PF00356:Bacterial regulatory proteins, lacI fa…
2345552,2345553	pb7_GM002289	Chr1	2345379	2345645	+	{SQH17843.1; spermidine synthase [Bordetella parapertussis]}	{NA}	{NA}	{NA}	{NA}	{NA}	{NA}	{NA}	{NA}	{NA}	{NA}	{false}	{NA}	{NA}
2358394	pb7_GM002304	Chr1	2356941	2358617	+	{WP_010930720.1; patatin-like phospholipase family protein [Bordetella pertussis STO1-CHOC-0017|Bordetella pertussis|Bordetella pertussis H939|Bordetella pertussis STO1-CHOC-0019|Bordetella pertussis B200|Bordetella pertussis H921|Bordetella pertussis STO1-CHLA-0011|Bordetella pertussis STO1-CHOM-0012|Bordetella pertussis H918]}	{NA}	{bper:BN118_2056; K07001 K07001 NTE family protein -- }	{WP.012250167.1; COG1752 Predicted acylesterase/phospholipase RssA, containd patatin domain R General function prediction only ;}	{NA}	{GO:0006629; lipid metabolic process; biological_process}	{NA}	{NA}	{NA}	{NA}	{NA}	{false}	{NA}	{PF01734:Patatin-like phospholipase}
2394375	pb7_GM002337	Chr1	2393937	2394413	+	{EWM44627.1; helix-turn-helix family protein [Bordetella pertussis|Bordetella holmesii 70147]}	{NA}	{bhm:D558_0115; }	{WP.049098620.1; COG2963 Transposase InsE and inactivated derivatives X Mobilome: prophages, transposons;}	{NA}	{GO:0006313; transposition, DNA-mediated; biological_process GO:0003700; sequence-specific DNA binding transcription factor activity; molecular_function GO:0005622; intracellular; cellular_component GO:0006352; transcription initiation, DNA-dependent; biological_process GO:0015074; DNA integration; biological_process GO:0004803; transposase activity; molecular_function GO:0016987; sigma factor ac…	{NA}	{NA}	{NA}	{NA}	{NA}	{false}	{NA}	{PF01325:Iron dependent repressor, N-terminal DNA binding domain PF13411:MerR HTH family regulatory protein PF09048:Cro PF04218:CENP-B N-terminal DNA-binding domain PF04545:Sigma-70, region 4 PF13404:AsnC-type helix-turn-helix domain PF08281:Sigma-70, region 4 PF01022:Bacterial regulatory protein, arsR family PF05225:helix-turn-helix, Psq domain PF01371:Trp repressor protein PF01381:Helix-turn-he…
2500840	pb7_GM002456	Chr1	2500491	2500928	+	{ETH66477.1; transposase, IS481 family [Bordetella pertussis STO1-CHLA-0006|Bordetella pertussis]}	{NA}	{bhm:D558_0115; }	{NA}	{NA}	{GO:0006310; DNA recombination; biological_process GO:0000150; recombinase activity; molecular_function GO:0003677; DNA binding; molecular_function GO:0004803; transposase activity; molecular_function GO:0015074; DNA integration; biological_process GO:0006352; transcription initiation, DNA-dependent; biological_process GO:0043565; sequence-specific DNA binding; molecular_function GO:0006355; regu…	{NA}	{NA}	{NA}	{NA}	{NA}	{false}	{NA}	{PF00325:Bacterial regulatory proteins, crp family PF01047:MarR family PF01498:Transposase PF00126:Bacterial regulatory helix-turn-helix protein, lysR family PF00376:MerR family regulatory protein PF04218:CENP-B N-terminal DNA-binding domain PF09048:Cro PF13411:MerR HTH family regulatory protein PF01325:Iron dependent repressor, N-terminal DNA binding domain PF13404:AsnC-type helix-turn-helix dom…
2532813	pb7_GM002488	Chr1	2532145	2533047	-	{WP_003818670.1; MULTISPECIES: GntR family transcriptional regulator [Bordetella pertussis H918|Bordetella bronchiseptica 00-P-2730|Bordetella pertussis STO1-CHOM-0012|Bordetella pertussis STO1-CHLA-0011|Bordetella pertussis H921|Bordetella bronchiseptica OSU553|Bordetella pertussis B200|Bordetella|Bordetella pertussis STO1-CHOC-0019|Bordetella pertussis H939|Bordetella pertussis STO1-CHOC-0017|B…	{NA}	{bbm:BN115_1938; }	{WP.012248906.1; COG2188 DNA-binding transcriptional regulator, GntR family K Transcription ;}	{NA}	{GO:0003700; sequence-specific DNA binding transcription factor activity; molecular_function GO:0006355; regulation of transcription, DNA-dependent; biological_process GO:0003677; DNA binding; molecular_function}	{NA}	{NA}	{NA}	{NA}	{NA}	{false}	{NA}	{PF00392:Bacterial regulatory proteins, gntR family PF09339:IclR helix-turn-helix domain PF07702:UTRA domain}
2797531	pb7_GM002739	Chr1	2797026	2797928	+	{ALX22557.1; integrase [Bordetella pertussis]}	{NA}	{bpet:B1917_2268; }	{WP.085748926.1; COG2801 Transposase InsO and inactivated derivatives X Mobilome: prophages, transposons;}	{NA}	{GO:0003677; DNA binding; molecular_function GO:0006352; transcription initiation, DNA-dependent; biological_process GO:0004803; transposase activity; molecular_function GO:0015074; DNA integration; biological_process GO:0016987; sigma factor activity; molecular_function GO:0043565; sequence-specific DNA binding; molecular_function GO:0006355; regulation of transcription, DNA-dependent; biologica…	{NA}	{NA}	{NA}	{NA}	{NA}	{false}	{AGW42619.1_; GH3 beta-glucosidase (EC 3.2.1.21); xylan 1,4-beta-xylosidase (EC 3.2.1.37); beta-glucosylceramidase (EC 3.2.1.45); beta-N-acetylhexosaminidase (EC 3.2.1.52); alpha-L-arabinofuranosidase (EC 3.2.1.55); glucan 1,4-beta-glucosidase (EC 3.2.1.74); isoprimeverose-producing oligoxyloglucan hydrolase (EC 3.2.1.120); coniferin beta-glucosidase (EC 3.2.1.126); exo-1,3-1,4-glucanase (EC 3.2.…	{PF00325:Bacterial regulatory proteins, crp family PF00376:MerR family regulatory protein PF01498:Transposase PF00665:Integrase core domain PF01047:MarR family PF01371:Trp repressor protein PF05225:helix-turn-helix, Psq domain PF01022:Bacterial regulatory protein, arsR family PF08281:Sigma-70, region 4 PF13404:AsnC-type helix-turn-helix domain PF04545:Sigma-70, region 4 PF04218:CENP-B N-terminal …
2859104	pb7_GM002801	Chr1	2858586	2859164	+	{SUV88880.1; transposase [Bordetella pertussis]}	{NA}	{bhm:D558_0873; }	{WP.049098620.1; COG2963 Transposase InsE and inactivated derivatives X Mobilome: prophages, transposons;}	{NA}	{GO:0000150; recombinase activity; molecular_function GO:0006310; DNA recombination; biological_process GO:0016987; sigma factor activity; molecular_function GO:0043565; sequence-specific DNA binding; molecular_function GO:0006355; regulation of transcription, DNA-dependent; biological_process GO:0006352; transcription initiation, DNA-dependent; biological_process GO:0004803; transposase activity…	{NA}	{NA}	{NA}	{NA}	{NA}	{false}	{NA}	{PF01371:Trp repressor protein PF05225:helix-turn-helix, Psq domain PF01022:Bacterial regulatory protein, arsR family PF08281:Sigma-70, region 4 PF13404:AsnC-type helix-turn-helix domain PF04545:Sigma-70, region 4 PF04218:CENP-B N-terminal DNA-binding domain PF09048:Cro PF01325:Iron dependent repressor, N-terminal DNA binding domain PF00392:Bacterial regulatory proteins, gntR family PF01527:Trans…
2871955	pb7_GM002815	Chr1	2871053	2871955	+	{WP_023997950.1; IS481 family transposase [Bordetella pertussis H921|Bordetella bronchiseptica MBORD681|Bordetella bronchiseptica MBORD698|Bordetella bronchiseptica MBORD849|Bordetella bronchiseptica MBORD782|Bordetella pertussis I176|Bordetella holmesii 1058|Bordetella holmesii 30539|Bordetella holmesii 41130|Bordetella pertussis H939|Bordetella pertussis]}	{NA}	{bpet:B1917_1003; }	{WP.085748926.1; COG2801 Transposase InsO and inactivated derivatives X Mobilome: prophages, transposons;}	{NA}	{GO:0003677; DNA binding; molecular_function GO:0004803; transposase activity; molecular_function GO:0015074; DNA integration; biological_process GO:0006352; transcription initiation, DNA-dependent; biological_process GO:0006355; regulation of transcription, DNA-dependent; biological_process GO:0043565; sequence-specific DNA binding; molecular_function GO:0016987; sigma factor activity; molecular…	{NA}	{NA}	{NA}	{NA}	{NA}	{false}	{AGW42619.1_; GH3 beta-glucosidase (EC 3.2.1.21); xylan 1,4-beta-xylosidase (EC 3.2.1.37); beta-glucosylceramidase (EC 3.2.1.45); beta-N-acetylhexosaminidase (EC 3.2.1.52); alpha-L-arabinofuranosidase (EC 3.2.1.55); glucan 1,4-beta-glucosidase (EC 3.2.1.74); isoprimeverose-producing oligoxyloglucan hydrolase (EC 3.2.1.120); coniferin beta-glucosidase (EC 3.2.1.126); exo-1,3-1,4-glucanase (EC 3.2.…	{PF00325:Bacterial regulatory proteins, crp family PF00376:MerR family regulatory protein PF01498:Transposase PF00665:Integrase core domain PF01047:MarR family PF01371:Trp repressor protein PF05225:helix-turn-helix, Psq domain PF01022:Bacterial regulatory protein, arsR family PF13404:AsnC-type helix-turn-helix domain PF08281:Sigma-70, region 4 PF04545:Sigma-70, region 4 PF04218:CENP-B N-terminal …
2892592,2892593,2892594,2893598,2893599	pb7_GM002839	Chr1	2892104	2893678	+	{SUV88752.1; membrane protein [Bordetella pertussis]}	{NA}	{bbx:BBS798_3668; }	{WP.013391927.1; COG1289 Uncharacterized membrane protein YccC S Function unknown ;}	{NA}	{GO:0006886; intracellular protein transport; biological_process GO:0016020; membrane; cellular_component GO:0015743; malate transport; biological_process GO:0005886; plasma membrane; cellular_component GO:0006810; transport; biological_process}	{NA}	{NA}	{NA}	{NA}	{NA}	{false}	{NA}	{PF05008:Vesicle transport v-SNARE protein N-terminus PF11744:Aluminium activated malate transporter PF04632:Fusaric acid resistance protein family}
2936180	pb7_GM002879	Chr1	2935783	2936685	-	{ALX19986.1; integrase [Bordetella pertussis]}	{NA}	{bpeu:Q425_30010; }	{WP.085748926.1; COG2801 Transposase InsO and inactivated derivatives X Mobilome: prophages, transposons;}	{NA}	{GO:0043565; sequence-specific DNA binding; molecular_function GO:0006355; regulation of transcription, DNA-dependent; biological_process GO:0016987; sigma factor activity; molecular_function GO:0006352; transcription initiation, DNA-dependent; biological_process GO:0004803; transposase activity; molecular_function GO:0015074; DNA integration; biological_process GO:0003677; DNA binding; molecular…	{NA}	{NA}	{NA}	{NA}	{NA}	{false}	{AGW42619.1_; GH3 beta-glucosidase (EC 3.2.1.21); xylan 1,4-beta-xylosidase (EC 3.2.1.37); beta-glucosylceramidase (EC 3.2.1.45); beta-N-acetylhexosaminidase (EC 3.2.1.52); alpha-L-arabinofuranosidase (EC 3.2.1.55); glucan 1,4-beta-glucosidase (EC 3.2.1.74); isoprimeverose-producing oligoxyloglucan hydrolase (EC 3.2.1.120); coniferin beta-glucosidase (EC 3.2.1.126); exo-1,3-1,4-glucanase (EC 3.2.…	{PF00376:MerR family regulatory protein PF01498:Transposase PF00665:Integrase core domain PF01047:MarR family PF00325:Bacterial regulatory proteins, crp family PF00392:Bacterial regulatory proteins, gntR family PF01527:Transposase PF00356:Bacterial regulatory proteins, lacI family PF09339:IclR helix-turn-helix domain PF01381:Helix-turn-helix PF01371:Trp repressor protein PF05225:helix-turn-helix,…
2984152	pb7_GM002922	Chr1	2983048	2984298	-	{ETA62958.1; hypothetical protein V483_1399 [Bordetella pertussis H934|Bordetella pertussis STO1-SEAT-0006|Bordetella pertussis STO1-CHLA-0006|Bordetella pertussis H973|Bordetella pertussis CHLA-15|Bordetella pertussis CHLA-20|Bordetella pertussis 2250905|Bordetella pertussis CHLA-11|Bordetella pertussis H921|Bordetella pertussis H897|Bordetella pertussis I036|Bordetella pertussis STO1-CHLA-0011|…	{NA}	{bper:BN118_1943; }	{NA}	{NA}	{NA}	{NA}	{NA}	{NA}	{NA}	{NA}	{false}	{NA}	{NA}
2988087	pb7_GM002928	Chr1	2987678	2989249	-	{WP_015039611.1; hypothetical protein [Bordetella parapertussis Bpp5|Bordetella parapertussis]}	{NA}	{bpar:BN117_1967; K02498 hemY HemY protein -- }	{WP.012248984.1; COG3071 Uncharacterized protein HemY, contains HemY_N domain and TPR repeats (unrelated to protoporphyrinogen oxidase HemY) S Function unknown ;}	{NA}	{GO:0005515; protein binding; molecular_function}	{NA}	{NA}	{NA}	{NA}	{NA}	{false}	{NA}	{PF13176:Tetratricopeptide repeat PF00515:Tetratricopeptide repeat}
3037034,3037035,3037036	pb7_GM002978	Chr1	3036470	3037375	+	{WP_023995235.1; IS481 family transposase [Bordetella pertussis|Bordetella holmesii 30539|Bordetella holmesii 41130|Bordetella pertussis STO1-CHOC-0021|Bordetella holmesii 1058]}	{NA}	{bpeu:Q425_35100; }	{WP.085748926.1; COG2801 Transposase InsO and inactivated derivatives X Mobilome: prophages, transposons;}	{NA}	{GO:0005622; intracellular; cellular_component GO:0003700; sequence-specific DNA binding transcription factor activity; molecular_function GO:0006313; transposition, DNA-mediated; biological_process GO:0003677; DNA binding; molecular_function GO:0015074; DNA integration; biological_process GO:0004803; transposase activity; molecular_function GO:0006352; transcription initiation, DNA-dependent; bi…	{NA}	{NA}	{NA}	{NA}	{NA}	{false}	{AGW42619.1_; GH3 beta-glucosidase (EC 3.2.1.21); xylan 1,4-beta-xylosidase (EC 3.2.1.37); beta-glucosylceramidase (EC 3.2.1.45); beta-N-acetylhexosaminidase (EC 3.2.1.52); alpha-L-arabinofuranosidase (EC 3.2.1.55); glucan 1,4-beta-glucosidase (EC 3.2.1.74); isoprimeverose-producing oligoxyloglucan hydrolase (EC 3.2.1.120); coniferin beta-glucosidase (EC 3.2.1.126); exo-1,3-1,4-glucanase (EC 3.2.…	{PF00356:Bacterial regulatory proteins, lacI family PF00392:Bacterial regulatory proteins, gntR family PF01527:Transposase PF01381:Helix-turn-helix PF09339:IclR helix-turn-helix domain PF05225:helix-turn-helix, Psq domain PF01022:Bacterial regulatory protein, arsR family PF01371:Trp repressor protein PF04218:CENP-B N-terminal DNA-binding domain PF01325:Iron dependent repressor, N-terminal DNA bin…
3090014,3090015,3090016	pb7_GM003029	Chr1	3089676	3090581	-	{ALX19986.1; integrase [Bordetella pertussis]}	{NA}	{bpeu:Q425_30010; }	{WP.085748926.1; COG2801 Transposase InsO and inactivated derivatives X Mobilome: prophages, transposons;}	{NA}	{GO:0043565; sequence-specific DNA binding; molecular_function GO:0016987; sigma factor activity; molecular_function GO:0006355; regulation of transcription, DNA-dependent; biological_process GO:0004803; transposase activity; molecular_function GO:0006352; transcription initiation, DNA-dependent; biological_process GO:0015074; DNA integration; biological_process GO:0003677; DNA binding; molecular…	{NA}	{NA}	{NA}	{NA}	{NA}	{false}	{AGW42619.1_; GH3 beta-glucosidase (EC 3.2.1.21); xylan 1,4-beta-xylosidase (EC 3.2.1.37); beta-glucosylceramidase (EC 3.2.1.45); beta-N-acetylhexosaminidase (EC 3.2.1.52); alpha-L-arabinofuranosidase (EC 3.2.1.55); glucan 1,4-beta-glucosidase (EC 3.2.1.74); isoprimeverose-producing oligoxyloglucan hydrolase (EC 3.2.1.120); coniferin beta-glucosidase (EC 3.2.1.126); exo-1,3-1,4-glucanase (EC 3.2.…	{PF01022:Bacterial regulatory protein, arsR family PF05225:helix-turn-helix, Psq domain PF01371:Trp repressor protein PF01325:Iron dependent repressor, N-terminal DNA binding domain PF04218:CENP-B N-terminal DNA-binding domain PF04545:Sigma-70, region 4 PF13404:AsnC-type helix-turn-helix domain PF08281:Sigma-70, region 4 PF00356:Bacterial regulatory proteins, lacI family PF01527:Transposase PF003…
3127588	pb7_GM003068	Chr1	3126052	3133668	-	{WP_010931066.1; hemagglutinin repeat-containing protein [Bordetella pertussis H939|Bordetella pertussis B1920|Bordetella pertussis|Bordetella pertussis B1917|Bordetella pertussis CS|Bordetella pertussis H918]}	{P12255; Filamentous hemagglutinin }	{bpe:BP2667; K15125 fhaB filamentous hemagglutinin -- Human Diseases; Infectious diseases: Bacterial; Pertussis [PATH:ko05133]}	{NA}	{NA}	{NA}	{NA}	{VFG010934; CVF367 FHA-like proteins fhaS adhesin - - - -}	{NA}	{NA}	{YES}	{false}	{NA}	{NA}
3195563,3195931	pb7_GM003126	Chr1	3195058	3195960	+	{ALX20375.1; integrase [Bordetella pertussis]}	{NA}	{bpet:B1917_1127; }	{WP.085748926.1; COG2801 Transposase InsO and inactivated derivatives X Mobilome: prophages, transposons;}	{NA}	{GO:0005622; intracellular; cellular_component GO:0003700; sequence-specific DNA binding transcription factor activity; molecular_function GO:0006313; transposition, DNA-mediated; biological_process GO:0003677; DNA binding; molecular_function GO:0006355; regulation of transcription, DNA-dependent; biological_process GO:0043565; sequence-specific DNA binding; molecular_function GO:0016987; sigma f…	{NA}	{NA}	{NA}	{NA}	{NA}	{false}	{AGW42619.1_; GH3 beta-glucosidase (EC 3.2.1.21); xylan 1,4-beta-xylosidase (EC 3.2.1.37); beta-glucosylceramidase (EC 3.2.1.45); beta-N-acetylhexosaminidase (EC 3.2.1.52); alpha-L-arabinofuranosidase (EC 3.2.1.55); glucan 1,4-beta-glucosidase (EC 3.2.1.74); isoprimeverose-producing oligoxyloglucan hydrolase (EC 3.2.1.120); coniferin beta-glucosidase (EC 3.2.1.126); exo-1,3-1,4-glucanase (EC 3.2.…	{PF01371:Trp repressor protein PF05225:helix-turn-helix, Psq domain PF01022:Bacterial regulatory protein, arsR family PF13404:AsnC-type helix-turn-helix domain PF08281:Sigma-70, region 4 PF04545:Sigma-70, region 4 PF04218:CENP-B N-terminal DNA-binding domain PF01325:Iron dependent repressor, N-terminal DNA binding domain PF00392:Bacterial regulatory proteins, gntR family PF01527:Transposase PF003…
3206091,3206759	pb7_GM003139	Chr1	3206087	3206989	-	{WP_023995235.1; IS481 family transposase [Bordetella pertussis|Bordetella holmesii 30539|Bordetella holmesii 41130|Bordetella pertussis STO1-CHOC-0021|Bordetella holmesii 1058]}	{NA}	{bpeu:Q425_35100; }	{WP.085748926.1; COG2801 Transposase InsO and inactivated derivatives X Mobilome: prophages, transposons;}	{NA}	{GO:0003700; sequence-specific DNA binding transcription factor activity; molecular_function GO:0006313; transposition, DNA-mediated; biological_process GO:0005622; intracellular; cellular_component GO:0006355; regulation of transcription, DNA-dependent; biological_process GO:0043565; sequence-specific DNA binding; molecular_function GO:0016987; sigma factor activity; molecular_function GO:000480…	{NA}	{NA}	{NA}	{NA}	{NA}	{false}	{AGW42619.1_; GH3 beta-glucosidase (EC 3.2.1.21); xylan 1,4-beta-xylosidase (EC 3.2.1.37); beta-glucosylceramidase (EC 3.2.1.45); beta-N-acetylhexosaminidase (EC 3.2.1.52); alpha-L-arabinofuranosidase (EC 3.2.1.55); glucan 1,4-beta-glucosidase (EC 3.2.1.74); isoprimeverose-producing oligoxyloglucan hydrolase (EC 3.2.1.120); coniferin beta-glucosidase (EC 3.2.1.126); exo-1,3-1,4-glucanase (EC 3.2.…	{PF00356:Bacterial regulatory proteins, lacI family PF00392:Bacterial regulatory proteins, gntR family PF01527:Transposase PF01381:Helix-turn-helix PF09339:IclR helix-turn-helix domain PF05225:helix-turn-helix, Psq domain PF01022:Bacterial regulatory protein, arsR family PF01371:Trp repressor protein PF04218:CENP-B N-terminal DNA-binding domain PF01325:Iron dependent repressor, N-terminal DNA bin…
3303036	pb7_GM003227	Chr1	3303017	3303919	+	{WP_023997950.1; IS481 family transposase [Bordetella pertussis H921|Bordetella bronchiseptica MBORD681|Bordetella bronchiseptica MBORD698|Bordetella bronchiseptica MBORD849|Bordetella bronchiseptica MBORD782|Bordetella pertussis I176|Bordetella holmesii 1058|Bordetella holmesii 30539|Bordetella holmesii 41130|Bordetella pertussis H939|Bordetella pertussis]}	{NA}	{bpet:B1917_1003; }	{WP.085748926.1; COG2801 Transposase InsO and inactivated derivatives X Mobilome: prophages, transposons;}	{NA}	{GO:0003677; DNA binding; molecular_function GO:0004803; transposase activity; molecular_function GO:0015074; DNA integration; biological_process GO:0006352; transcription initiation, DNA-dependent; biological_process GO:0016987; sigma factor activity; molecular_function GO:0043565; sequence-specific DNA binding; molecular_function GO:0006355; regulation of transcription, DNA-dependent; biologica…	{NA}	{NA}	{NA}	{NA}	{NA}	{false}	{AGW42619.1_; GH3 beta-glucosidase (EC 3.2.1.21); xylan 1,4-beta-xylosidase (EC 3.2.1.37); beta-glucosylceramidase (EC 3.2.1.45); beta-N-acetylhexosaminidase (EC 3.2.1.52); alpha-L-arabinofuranosidase (EC 3.2.1.55); glucan 1,4-beta-glucosidase (EC 3.2.1.74); isoprimeverose-producing oligoxyloglucan hydrolase (EC 3.2.1.120); coniferin beta-glucosidase (EC 3.2.1.126); exo-1,3-1,4-glucanase (EC 3.2.…	{PF01022:Bacterial regulatory protein, arsR family PF05225:helix-turn-helix, Psq domain PF01371:Trp repressor protein PF01325:Iron dependent repressor, N-terminal DNA binding domain PF04218:CENP-B N-terminal DNA-binding domain PF04545:Sigma-70, region 4 PF08281:Sigma-70, region 4 PF13404:AsnC-type helix-turn-helix domain PF00356:Bacterial regulatory proteins, lacI family PF01527:Transposase PF003…
3328940	pb7_GM003256	Chr1	3328906	3329484	-	{ETH77794.1; transposase, IS481 family [Bordetella pertussis STO1-CHOC-0016]}	{NA}	{bhm:D558_0873; }	{WP.049098620.1; COG2963 Transposase InsE and inactivated derivatives X Mobilome: prophages, transposons;}	{NA}	{GO:0003700; sequence-specific DNA binding transcription factor activity; molecular_function GO:0006313; transposition, DNA-mediated; biological_process GO:0005622; intracellular; cellular_component GO:0006355; regulation of transcription, DNA-dependent; biological_process GO:0043565; sequence-specific DNA binding; molecular_function GO:0016987; sigma factor activity; molecular_function GO:000480…	{NA}	{NA}	{NA}	{NA}	{NA}	{false}	{NA}	{PF00325:Bacterial regulatory proteins, crp family PF01047:MarR family PF00376:MerR family regulatory protein PF01498:Transposase PF00665:Integrase core domain PF00126:Bacterial regulatory helix-turn-helix protein, lysR family PF13404:AsnC-type helix-turn-helix domain PF08281:Sigma-70, region 4 PF04545:Sigma-70, region 4 PF04218:CENP-B N-terminal DNA-binding domain PF09048:Cro PF01325:Iron depend…
3361931	pb7_GM003288	Chr1	3360861	3361937	-	{AUR55026.1; integrase [Bordetella pertussis]}	{NA}	{bper:BN118_0302; }	{WP.085748926.1; COG2801 Transposase InsO and inactivated derivatives X Mobilome: prophages, transposons;}	{NA}	{GO:0003700; sequence-specific DNA binding transcription factor activity; molecular_function GO:0005622; intracellular; cellular_component GO:0030288; outer membrane-bounded periplasmic space; cellular_component GO:0006352; transcription initiation, DNA-dependent; biological_process GO:0015074; DNA integration; biological_process GO:0043565; sequence-specific DNA binding; molecular_function GO:00…	{NA}	{NA}	{NA}	{NA}	{NA}	{false}	{AGW42619.1_; GH3 beta-glucosidase (EC 3.2.1.21); xylan 1,4-beta-xylosidase (EC 3.2.1.37); beta-glucosylceramidase (EC 3.2.1.45); beta-N-acetylhexosaminidase (EC 3.2.1.52); alpha-L-arabinofuranosidase (EC 3.2.1.55); glucan 1,4-beta-glucosidase (EC 3.2.1.74); isoprimeverose-producing oligoxyloglucan hydrolase (EC 3.2.1.120); coniferin beta-glucosidase (EC 3.2.1.126); exo-1,3-1,4-glucanase (EC 3.2.…	{PF00665:Integrase core domain PF03401:Tripartite tricarboxylate transporter family receptor PF00356:Bacterial regulatory proteins, lacI family PF09339:IclR helix-turn-helix domain PF01381:Helix-turn-helix PF01047:MarR family PF01371:Trp repressor protein PF00325:Bacterial regulatory proteins, crp family PF04545:Sigma-70, region 4 PF13404:AsnC-type helix-turn-helix domain PF08281:Sigma-70, region…
3385917	pb7_GM003318	Chr1	3385344	3385991	+	{KCV18816.1; homeodomain-like domain protein [Bordetella pertussis B200]}	{NA}	{bhm:D558_0873; }	{WP.085748926.1; COG2801 Transposase InsO and inactivated derivatives X Mobilome: prophages, transposons;}	{NA}	{GO:0006310; DNA recombination; biological_process GO:0000150; recombinase activity; molecular_function GO:0003677; DNA binding; molecular_function GO:0004803; transposase activity; molecular_function GO:0006352; transcription initiation, DNA-dependent; biological_process GO:0015074; DNA integration; biological_process GO:0006355; regulation of transcription, DNA-dependent; biological_process GO:…	{NA}	{NA}	{NA}	{NA}	{NA}	{false}	{NA}	{PF00356:Bacterial regulatory proteins, lacI family PF00392:Bacterial regulatory proteins, gntR family PF01527:Transposase PF02796:Helix-turn-helix domain of resolvase PF01381:Helix-turn-helix PF09339:IclR helix-turn-helix domain PF05225:helix-turn-helix, Psq domain PF01022:Bacterial regulatory protein, arsR family PF01371:Trp repressor protein PF04218:CENP-B N-terminal DNA-binding domain PF01325…
3459878	pb7_GM003383	Chr1	3459685	3459918	-	{AUL10657.1; hypothetical protein BOB51_05115 [Bordetella pertussis]}	{NA}	{NA}	{NA}	{NA}	{NA}	{NA}	{NA}	{NA}	{NA}	{NA}	{false}	{NA}	{NA}
3581788	pb7_GM003496	Chr1	3581788	3582351	-	{ETH70767.1; transposase, IS481 family [Bordetella pertussis STO1-CHLA-0011]}	{NA}	{bhm:D558_0873; }	{WP.085748926.1; COG2801 Transposase InsO and inactivated derivatives X Mobilome: prophages, transposons;}	{NA}	{GO:0006310; DNA recombination; biological_process GO:0000150; recombinase activity; molecular_function GO:0003677; DNA binding; molecular_function GO:0016987; sigma factor activity; molecular_function GO:0043565; sequence-specific DNA binding; molecular_function GO:0006355; regulation of transcription, DNA-dependent; biological_process GO:0015074; DNA integration; biological_process GO:0004803; …	{NA}	{NA}	{NA}	{NA}	{NA}	{false}	{NA}	{PF09339:IclR helix-turn-helix domain PF02796:Helix-turn-helix domain of resolvase PF01381:Helix-turn-helix PF00392:Bacterial regulatory proteins, gntR family PF01527:Transposase PF00356:Bacterial regulatory proteins, lacI family PF13443:Cro/C1-type HTH DNA-binding domain PF08281:Sigma-70, region 4 PF13404:AsnC-type helix-turn-helix domain PF04545:Sigma-70, region 4 PF04218:CENP-B N-terminal DNA-…
3618805	pb7_GM003532	Chr1	3618229	3618813	+	{ETH56737.1; transposase, IS481 family, partial [Bordetella pertussis I002]}	{NA}	{bhm:D558_0873; }	{WP.085748926.1; COG2801 Transposase InsO and inactivated derivatives X Mobilome: prophages, transposons;}	{NA}	{GO:0006313; transposition, DNA-mediated; biological_process GO:0003700; sequence-specific DNA binding transcription factor activity; molecular_function GO:0005622; intracellular; cellular_component GO:0000150; recombinase activity; molecular_function GO:0006310; DNA recombination; biological_process GO:0006352; transcription initiation, DNA-dependent; biological_process GO:0004803; transposase a…	{NA}	{NA}	{NA}	{NA}	{NA}	{false}	{NA}	{PF00325:Bacterial regulatory proteins, crp family PF01498:Transposase PF00665:Integrase core domain PF00126:Bacterial regulatory helix-turn-helix protein, lysR family PF00376:MerR family regulatory protein PF01047:MarR family PF05225:helix-turn-helix, Psq domain PF01022:Bacterial regulatory protein, arsR family PF01371:Trp repressor protein PF04218:CENP-B N-terminal DNA-binding domain PF01325:Ir…
3637783	pb7_GM003554	Chr1	3637304	3637882	+	{ETH21187.1; transposase, IS481 family [Bordetella pertussis CHLA-13]}	{NA}	{bpeu:Q425_29450; }	{WP.049098620.1; COG2963 Transposase InsE and inactivated derivatives X Mobilome: prophages, transposons;}	{NA}	{GO:0006310; DNA recombination; biological_process GO:0000150; recombinase activity; molecular_function GO:0003677; DNA binding; molecular_function GO:0006352; transcription initiation, DNA-dependent; biological_process GO:0004803; transposase activity; molecular_function GO:0015074; DNA integration; biological_process GO:0043565; sequence-specific DNA binding; molecular_function GO:0016987; sigm…	{NA}	{NA}	{NA}	{NA}	{NA}	{false}	{NA}	{PF05225:helix-turn-helix, Psq domain PF01022:Bacterial regulatory protein, arsR family PF01371:Trp repressor protein PF04218:CENP-B N-terminal DNA-binding domain PF01325:Iron dependent repressor, N-terminal DNA binding domain PF13411:MerR HTH family regulatory protein PF09048:Cro PF13404:AsnC-type helix-turn-helix domain PF08281:Sigma-70, region 4 PF04545:Sigma-70, region 4 PF00356:Bacterial reg…
3675948	pb7_GM003589	Chr1	3675384	3676337	+	{KAK69228.1; metallo-beta-lactamase domain protein [Bordetella bronchiseptica Bbr77|Bordetella bronchiseptica RB50|Bordetella bronchiseptica 253|Bordetella bronchiseptica MO211|Bordetella bronchiseptica|Bordetella bronchiseptica MO149|Bordetella bronchiseptica 1289]}	{NA}	{bbr:BB0896; }	{WP.013396191.1; COG0491 Glyoxylase or a related metal-dependent hydrolase, beta-lactamase superfamily II R General function prediction only ;}	{NA}	{GO:0016787; hydrolase activity; molecular_function}	{NA}	{NA}	{NA}	{NA}	{NA}	{false}	{NA}	{PF00753:Metallo-beta-lactamase superfamily}
3762201	pb7_GM003669	Chr1	3761795	3762697	+	{WP_023995235.1; IS481 family transposase [Bordetella pertussis|Bordetella holmesii 30539|Bordetella holmesii 41130|Bordetella pertussis STO1-CHOC-0021|Bordetella holmesii 1058]}	{NA}	{bpeu:Q425_35100; }	{WP.085748926.1; COG2801 Transposase InsO and inactivated derivatives X Mobilome: prophages, transposons;}	{NA}	{GO:0003677; DNA binding; molecular_function GO:0006355; regulation of transcription, DNA-dependent; biological_process GO:0043565; sequence-specific DNA binding; molecular_function GO:0016987; sigma factor activity; molecular_function GO:0004803; transposase activity; molecular_function GO:0006352; transcription initiation, DNA-dependent; biological_process GO:0015074; DNA integration; biologica…	{NA}	{NA}	{NA}	{NA}	{NA}	{false}	{AGW42619.1_; GH3 beta-glucosidase (EC 3.2.1.21); xylan 1,4-beta-xylosidase (EC 3.2.1.37); beta-glucosylceramidase (EC 3.2.1.45); beta-N-acetylhexosaminidase (EC 3.2.1.52); alpha-L-arabinofuranosidase (EC 3.2.1.55); glucan 1,4-beta-glucosidase (EC 3.2.1.74); isoprimeverose-producing oligoxyloglucan hydrolase (EC 3.2.1.120); coniferin beta-glucosidase (EC 3.2.1.126); exo-1,3-1,4-glucanase (EC 3.2.…	{PF00325:Bacterial regulatory proteins, crp family PF01047:MarR family PF00665:Integrase core domain PF01498:Transposase PF00376:MerR family regulatory protein PF01325:Iron dependent repressor, N-terminal DNA binding domain PF04218:CENP-B N-terminal DNA-binding domain PF04545:Sigma-70, region 4 PF08281:Sigma-70, region 4 PF13404:AsnC-type helix-turn-helix domain PF01022:Bacterial regulatory prote…
3767699,3767700	pb7_GM003675	Chr1	3767422	3767700	+	{SPR40450.1; IS110 family [Bordetella pertussis]}	{NA}	{NA}	{NA}	{NA}	{GO:0004803; transposase activity; molecular_function GO:0003677; DNA binding; molecular_function GO:0006313; transposition, DNA-mediated; biological_process}	{NA}	{NA}	{NA}	{NA}	{NA}	{false}	{NA}	{PF01548:Transposase}
3776130	pb7_GM003685	Chr1	3776094	3776399	-	{CFP54898.1; cytochrome oxidase [Bordetella pertussis]}	{NA}	{NA}	{NA}	{NA}	{GO:0055114; oxidation-reduction process; biological_process GO:0016020; membrane; cellular_component}	{NA}	{NA}	{NA}	{NA}	{NA}	{false}	{NA}	{PF02322:Cytochrome bd terminal oxidase subunit II}
3817470	pb7_GM003722	Chr1	3817237	3818178	+	{WP_023997720.1; IS481-like element IS481 family transposase [Bordetella pertussis]}	{NA}	{bper:BN118_0302; }	{WP.085748926.1; COG2801 Transposase InsO and inactivated derivatives X Mobilome: prophages, transposons;}	{NA}	{GO:0005622; intracellular; cellular_component GO:0003700; sequence-specific DNA binding transcription factor activity; molecular_function GO:0006313; transposition, DNA-mediated; biological_process GO:0003677; DNA binding; molecular_function GO:0006355; regulation of transcription, DNA-dependent; biological_process GO:0043565; sequence-specific DNA binding; molecular_function GO:0016987; sigma f…	{NA}	{NA}	{NA}	{NA}	{NA}	{false}	{AGW42619.1_; GH3 beta-glucosidase (EC 3.2.1.21); xylan 1,4-beta-xylosidase (EC 3.2.1.37); beta-glucosylceramidase (EC 3.2.1.45); beta-N-acetylhexosaminidase (EC 3.2.1.52); alpha-L-arabinofuranosidase (EC 3.2.1.55); glucan 1,4-beta-glucosidase (EC 3.2.1.74); isoprimeverose-producing oligoxyloglucan hydrolase (EC 3.2.1.120); coniferin beta-glucosidase (EC 3.2.1.126); exo-1,3-1,4-glucanase (EC 3.2.…	{PF01325:Iron dependent repressor, N-terminal DNA binding domain PF04545:Sigma-70, region 4 PF08281:Sigma-70, region 4 PF13404:AsnC-type helix-turn-helix domain PF00325:Bacterial regulatory proteins, crp family PF01371:Trp repressor protein PF01381:Helix-turn-helix PF01047:MarR family PF09339:IclR helix-turn-helix domain PF00665:Integrase core domain PF00356:Bacterial regulatory proteins, lacI fa…
3824431	pb7_GM003730	Chr1	3824147	3824521	+	{Q7VU61.1; RecName: Full=Protein ApaG [Bordetella pertussis B1920|Bordetella pertussis|Bordetella pertussis 137|Bordetella pertussis CS|Bordetella pertussis Tohama I|Bordetella pertussis 18323|Bordetella parapertussis|Bordetella pertussis B1917|Bordetella parapertussis 12822|Bordetella bronchiseptica RB50]}	{Q7WEL1; Protein ApaG }	{bpet:B1917_0556; K06195 apaG ApaG protein -- }	{WP.041862624.1; COG2967 Uncharacterized conserved protein ApaG affecting Mg2+/Co2+ transport P Inorganic ion transport and metabolism ;}	{NA}	{NA}	{NA}	{NA}	{NA}	{NA}	{NA}	{true}	{NA}	{NA}
3852658,3852659	pb7_GM003758	Chr1	3852384	3852683	-	{ANT92541.1; hypothetical protein BBB38_05425 [Bordetella pertussis]}	{NA}	{bbro:BAU06_06220; }	{NA}	{NA}	{NA}	{NA}	{NA}	{NA}	{NA}	{NA}	{false}	{NA}	{NA}
3895543	pb7_GM003805	Chr1	3894874	3895776	-	{WP_023997950.1; IS481 family transposase [Bordetella pertussis H921|Bordetella bronchiseptica MBORD681|Bordetella bronchiseptica MBORD698|Bordetella bronchiseptica MBORD849|Bordetella bronchiseptica MBORD782|Bordetella pertussis I176|Bordetella holmesii 1058|Bordetella holmesii 30539|Bordetella holmesii 41130|Bordetella pertussis H939|Bordetella pertussis]}	{NA}	{bpet:B1917_1003; }	{WP.085748926.1; COG2801 Transposase InsO and inactivated derivatives X Mobilome: prophages, transposons;}	{NA}	{GO:0006313; transposition, DNA-mediated; biological_process GO:0003700; sequence-specific DNA binding transcription factor activity; molecular_function GO:0005622; intracellular; cellular_component GO:0016987; sigma factor activity; molecular_function GO:0043565; sequence-specific DNA binding; molecular_function GO:0006355; regulation of transcription, DNA-dependent; biological_process GO:000480…	{NA}	{NA}	{NA}	{NA}	{NA}	{false}	{AGW42619.1_; GH3 beta-glucosidase (EC 3.2.1.21); xylan 1,4-beta-xylosidase (EC 3.2.1.37); beta-glucosylceramidase (EC 3.2.1.45); beta-N-acetylhexosaminidase (EC 3.2.1.52); alpha-L-arabinofuranosidase (EC 3.2.1.55); glucan 1,4-beta-glucosidase (EC 3.2.1.74); isoprimeverose-producing oligoxyloglucan hydrolase (EC 3.2.1.120); coniferin beta-glucosidase (EC 3.2.1.126); exo-1,3-1,4-glucanase (EC 3.2.…	{PF01381:Helix-turn-helix PF09339:IclR helix-turn-helix domain PF00356:Bacterial regulatory proteins, lacI family PF01527:Transposase PF00392:Bacterial regulatory proteins, gntR family PF01325:Iron dependent repressor, N-terminal DNA binding domain PF04218:CENP-B N-terminal DNA-binding domain PF04545:Sigma-70, region 4 PF13404:AsnC-type helix-turn-helix domain PF08281:Sigma-70, region 4 PF01022:B…
3923130	pb7_GM003833	Chr1	3922992	3923909	-	{ETH47360.1; transposase, IS481 family [Bordetella pertussis H921]}	{NA}	{bho:D560_2034; }	{WP.049098620.1; COG2963 Transposase InsE and inactivated derivatives X Mobilome: prophages, transposons;}	{NA}	{GO:0003677; DNA binding; molecular_function GO:0004803; transposase activity; molecular_function GO:0006352; transcription initiation, DNA-dependent; biological_process GO:0015074; DNA integration; biological_process GO:0043565; sequence-specific DNA binding; molecular_function GO:0016987; sigma factor activity; molecular_function GO:0006355; regulation of transcription, DNA-dependent; biologica…	{NA}	{NA}	{NA}	{NA}	{NA}	{false}	{AGW42619.1_; GH3 beta-glucosidase (EC 3.2.1.21); xylan 1,4-beta-xylosidase (EC 3.2.1.37); beta-glucosylceramidase (EC 3.2.1.45); beta-N-acetylhexosaminidase (EC 3.2.1.52); alpha-L-arabinofuranosidase (EC 3.2.1.55); glucan 1,4-beta-glucosidase (EC 3.2.1.74); isoprimeverose-producing oligoxyloglucan hydrolase (EC 3.2.1.120); coniferin beta-glucosidase (EC 3.2.1.126); exo-1,3-1,4-glucanase (EC 3.2.…	{PF01047:MarR family PF01498:Transposase PF00665:Integrase core domain PF00376:MerR family regulatory protein PF00325:Bacterial regulatory proteins, crp family PF01381:Helix-turn-helix PF09339:IclR helix-turn-helix domain PF00356:Bacterial regulatory proteins, lacI family PF00392:Bacterial regulatory proteins, gntR family PF01527:Transposase PF04218:CENP-B N-terminal DNA-binding domain PF01325:Ir…
3986105	pb7_GM003888	Chr1	3985897	3986781	+	{WP_086091942.1; branched-chain amino acid ABC transporter permease [Bordetella genomosp. 6]}	{NA}	{bpc:BPTD_0628; K01997 livH branched-chain amino acid transport system permease protein -- Environmental Information Processing; Membrane transport; ABC transporters [PATH:ko02010] Cellular Processes; Cellular community - prokaryotes; Quorum sensing [PATH:ko02024]}	{WP.013395506.1; COG0559 Branched-chain amino acid ABC-type transport system, permease component E Amino acid transport and metabolism ;}	{NA}	{GO:0005215; NA GO:0016020; membrane; cellular_component GO:0006810; transport; biological_process}	{NA}	{NA}	{NA}	{NA}	{NA}	{false}	{NA}	{PF02653:Branched-chain amino acid transport system / permease component}
(Five candidate genes potentially involved in antibiotic resistance mechanisms are highlighted in green.)
